# Supplementary material for: New multi-target-directed small molecules against Alzheimer's disease: a combination of resveratrol and clioquinol
Source: Royal Society of Chemistry journal article supplement (doi:10.1039/c4ob00998c), 2014-06-13
Supplement: c4ob00998c1.pdf [file c4ob00998c1.pdf]

## Supporting Information

### New Multi-Target-Directed Small Molecules Against Alzheimer's Disease: The Combination of Resveratrol and Clioquinol

Fei Mao<sup>a</sup>, Jun Yan<sup>a</sup>, Jianheng Li<sup>a</sup>, Xian Jia<sup>b</sup>, Hui Miao<sup>a</sup>, Yang Sun<sup>a</sup>, Ling Huang<sup>a\*</sup>,  
Xingshu Li<sup>a\*</sup>

#### Table of Contents

|                                                                                        |    |
|----------------------------------------------------------------------------------------|----|
| 1. Chemistry-----                                                                      | 1  |
| 1.1 General Information. -----                                                         | 1  |
| 1.2 The general procedure for preparation of <b>2</b> and <b>4</b> -----               | 1  |
| 1.3 The preparation of 3,5-bis(methoxymethoxy)benzaldehyde <b>5</b> -----              | 2  |
| 1.4 General procedure for the preparation of <b>8</b> -----                            | 2  |
| 1.5 General procedure for the preparation of <b>9</b> -----                            | 2  |
| 1.6 General procedure for the preparation of <b>10</b> -----                           | 4  |
| 1.7 General procedure for the preparation of <b>12</b> -----                           | 4  |
| 1.8 General procedure for the preparation of <b>13</b> -----                           | 5  |
| 1.9 General procedure for the preparation of <b>10g, 13h-13i</b> -----                 | 6  |
| 2. Biological Assays-----                                                              | 7  |
| 2.1 ThT Assay -----                                                                    | 7  |
| 2.2 TEM Assay-----                                                                     | 7  |
| 2.3 Oxygen Radical Absorbance Capacity (ORAC-FL)-- -----                               | 7  |
| 2.4 Metal Chelation -----                                                              | 8  |
| 2.5 Ascorbate Studies -----                                                            | 8  |
| 2.6 In vitro Blood-Brain Barrier Permeation Assay (Figure S1, Table S1, Table S2)----  | 8  |
| 2.7 Statistical Analysis -----                                                         | 10 |
| 3. Acute Toxicity Assay-----                                                           | 10 |
| 4. NMR spectra of compounds <b>10a-10e, 10g, 13a-e</b> and <b>13h-13i</b> -----        | 10 |
| 5. HPLC chromatograms of compounds <b>10a-10e, 10g, 13a-e</b> and <b>13h-13i</b> ----- | 24 |
| 6. References -----                                                                    | 31 |

#### 1 Chemistry

##### 1.1 General information

The <sup>1</sup>H NMR and <sup>13</sup>C NMR spectra were recorded using TMS as the internal standard on a Bruker BioSpin GmbH spectrometer (AvanceIII, Switzerland) at 400.132 MHz and 100.614 MHz. Coupling constants are given in Hz. High-resolution mass spectra were obtained using a Shimadzu LCMS-IT-TOF mass spectrometer. Flash column chromatography was performed using silica gel (200–300 mesh) purchased from Qingdao Haiyang Chemical Co. Ltd or alumina from Sinopharm Chemical Reagent Co. Ltd. All reactions were monitored by thin layer chromatography using silica gel. The purity of compounds **10a-10e, 10g, 13a-e** and **13h-13i** (higher than 95%) was confirmed by HPLC [Agilent technologies 1200 series system (**10a-10c, 10e, 10g, 13b-13e, 13h-13i**) or

SHIMADZU LC-20A (**10d**, **13a**), TC-C18 column (4.6×250 mm, 5µm)] eluted with CH<sub>3</sub>CN:water (50 mM KH<sub>2</sub>PO<sub>4</sub>, pH=3.0) 70:30-35:65 at a flow rate of 0.5 mL/min or 1.0 mL/min).

## 1.2 General procedure for the preparation of **2** and **4**

The preparation was carried out according to a reported procedure.<sup>1</sup> MOMCl (3.5 mL, 45 mmol) was added dropwise to an ice-cooled solution of diisopropylethylamine (10.5 mL, 60 mmol) and **1**, **3** or another phenol (30 mmol) in dry CH<sub>2</sub>Cl<sub>2</sub> (40 mL). After complete addition, the reaction mixture was allowed to warm to ambient temperature and stirred for 5 h. The reaction mixture was diluted with CH<sub>2</sub>Cl<sub>2</sub>. The organic layer was washed with saturated aqueous NaHCO<sub>3</sub> and brine before being dried over Na<sub>2</sub>SO<sub>4</sub> and evaporated. The residue was purified by flash chromatography on silica gel with petrol/ethyl acetate (10:1) as the elution solvent to afford the major product.

### 4-(methoxymethoxy)benzaldehyde (**2**)

Colorless oil, 90% yield. <sup>1</sup>H NMR (400 MHz, CDCl<sub>3</sub>) δ 9.90 (s, 1H), 7.84 (d, *J* = 7.4 Hz, 2H), 7.15 (d, *J* = 8.6 Hz, 2H), 5.26 (s, 2H), 3.50 (s, 3H).

### Methyl 3,5-bis(methoxymethoxy)benzoate (**4**)

Colorless oil, 88% yield. <sup>1</sup>H NMR (400 MHz, CDCl<sub>3</sub>) δ 7.37 (d, *J* = 2.3 Hz, 2H), 6.92 (t, *J* = 2.2 Hz, 1H), 5.19 (s, 4H), 3.90 (s, 3H), 3.48 (s, 6H).

## 1.3 The preparation of 3,5-bis(methoxymethoxy)benzaldehyde (**5**).

The preparation was carried out according to a reported procedure.<sup>1, 2</sup> A solution of methyl 3,5-bis(methoxymethoxy)benzoate **4** (5.33 g, 20.8 mmol) in anhydrous THF (5 mL) was added dropwise to a stirred solution of lithium aluminium hydride (25 mL of a 1.0 M solution in THF, 25 mmol). The reaction mixture was stirred at ambient temperature for 4 h. Water (1 mL), 15% aqueous NaOH (1 mL) and water (3 mL) were sequentially added dropwise. After the final addition, stirring was continued for 1 h, and the mixture was filtered. The solid was washed with THF, and the filtrate was evaporated to provide 3,5-bis(methoxymethoxy)benzyl alcohol as a colourless oil (4.56 g, 96% yield). A solution of 3,5-bis(methoxymethoxy)benzyl alcohol (4.56, 20 mmol) in CH<sub>2</sub>Cl<sub>2</sub> (8 mL) was added in one portion to a solution of PCC (8.88 g, 41.2 mmol) and sodium acetate (1.13 g, 13.8 mmol) in CH<sub>2</sub>Cl<sub>2</sub> (45 mL). The mixture was stirred under nitrogen for 4 h. Ether (300 mL) was added, and the brown mixture was filtered through filter paper over celite. The filtrate was evaporated to provide a brown oil that was purified by flash chromatography with petrol/ethyl acetate (10:1) as the elution solvent to afford the product 3,5-bis(methoxymethoxy)benzaldehyde **5** as a colourless oil (5.45 g, 90.6% yield).

## 1.4 General procedure for the preparation of **8**

Compounds **7a** and **7b** were prepared according to a reported procedure.<sup>3, 4</sup> Triethyl phosphite (5.2 mL, 30 mmol) was added to a round-bottomed flask charged with **7a** or **7b** (10 mmol), and the mixture was heated to reflux for 5 h. Excess triethyl phosphite was removed by vacuum distillation, and the residue was purified by flash chromatography on silica gel with ethyl acetate as the elution solvent to afford the product diethyl ((8-hydroxyquinolin-5-yl)methyl)phosphonate (2.42 g, 82% yield) or diethyl ((8-hydroxy-2-methylquinolin-5-yl)methyl)phosphonate (2.32 g, 75% yield) as a yellow oil.

Compounds **8a** and **8b** were obtained using the general procedure described for the preparation **2** and **4** and were purified by flash chromatography on silica gel with ethyl acetate as the elution solvent.

### Diethyl ((8-(methoxymethoxy)quinolin-5-yl)methyl)phosphonate (**8a**)

Yellow oil, 86% yield. <sup>1</sup>H NMR (400 MHz, CDCl<sub>3</sub>) δ 8.97 (dd, *J* = 4.0, 1.5 Hz, 1H), 8.44 (dd, *J* = 8.6, 1.5 Hz, 1H), 7.49 (dd, *J* = 8.5, 4.1 Hz, 1H), 7.45 – 7.37 (m, 2H), 5.50 (s, 2H), 4.05 – 3.88 (m, 4H), 3.58 (s, 3H), 3.53 (d, *J* = 21.5 Hz, 2H), 1.18 (t, *J* = 7.0 Hz, 6H).

### Diethyl ((8-(methoxymethoxy)-2-methylquinolin-5-yl)methyl) phosphonate (**8b**)

Yellow oil, 76% yield.  $^1\text{H NMR}$  (400 MHz,  $\text{CDCl}_3$ )  $\delta$  8.31 (d,  $J = 8.8$  Hz, 1H), 7.41 – 7.32 (m, 3H), 5.49 (s, 2H), 4.05 – 3.84 (m, 4H), 3.59 (s, 3H), 3.51 (d,  $J = 21.4$  Hz, 2H), 2.79 (s, 3H), 1.18 (t,  $J = 7.1$  Hz, 6H).

### 1.5 General procedure for the preparation of **9**

Sodium methoxide (3 mmol) was added to a solution of phosphonic acid diethyl ester **8a** or **8b** (1 mmol) in dry DMF (2 mL). The resulting mixture was stirred at room temperature for 5 min, and the appropriate aldehyde (1.2 mmol) was added at  $0^\circ\text{C}$ . The mixture was stirred at room temperature for 0.5 h and then for 12 h at  $80^\circ\text{C}$ . The reaction was quenched by pouring into ice-water with stirring. Reactions that gave solids were filtered and dried. Reactions that gave oils were extracted with ethyl acetate, and the ethyl acetate layer was washed with water and brine and then dried over  $\text{Na}_2\text{SO}_4$ . Filtration and evaporation of the solvent afforded the oils. The crude solids or oils were purified by flash chromatography on silica gel with petrol/ ethyl acetate (1:1) as the elution solvent to afford the desired product.

#### (E)-4-(2-(8-(methoxymethoxy)quinolin-5-yl)vinyl)-N,N-dimethylaniline (**9a**)

Diethyl ((8-(methoxymethoxy)quinolin-5-yl)methyl)phosphonate **8a** was treated with 4-(dimethylamino)benzaldehyde according to general procedure to give the desired product **9a** as a yellow solid, 46% yield;  $^1\text{H NMR}$  (400 MHz,  $\text{CDCl}_3$ )  $\delta$  8.97 (d,  $J = 3.9$  Hz, 1H), 8.55 (d,  $J = 8.6$  Hz, 1H), 7.69 (d,  $J = 8.2$  Hz, 1H), 7.52 – 7.42 (m, 5H), 7.02 (d,  $J = 15.8$  Hz, 1H), 6.75 (d,  $J = 8.6$  Hz, 2H), 5.52 (s, 2H), 3.59 (s, 3H), 3.00 (s, 6H).

#### (E)-N,N-diethyl-4-(2-(8-(methoxymethoxy)quinolin-5-yl)vinyl)aniline (**9b**)

Diethyl ((8-(methoxymethoxy)quinolin-5-yl)methyl)phosphonate **8a** was treated with 4-(diethylamino)benzaldehyde according to general procedure to give the desired product **9b** as a yellow solid, 41% yield;  $^1\text{H NMR}$  (400 MHz,  $\text{CDCl}_3$ )  $\delta$  8.98 (s, 1H), 8.56 (d,  $J = 8.5$  Hz, 1H), 7.69 (d,  $J = 8.0$  Hz, 1H), 7.53 – 7.43 (m, 5H), 7.02 (d,  $J = 15.7$  Hz, 1H), 6.73 (s, 2H), 5.53 (s, 2H), 3.60 (s, 3H), 3.41 (s, 4H), 1.21 (t,  $J = 6.3$  Hz, 6H).

#### (E)-4-(2-(8-(methoxymethoxy)quinolin-5-yl)vinyl)phenol (**9c**)

Diethyl ((8-(methoxymethoxy)quinolin-5-yl)methyl)phosphonate **8a** was treated with 4-(methoxymethoxy)benzaldehyde **2** according to general procedure to give the desired product **9c** as a yellow solid, 52% yield;  $^1\text{H NMR}$  (400 MHz,  $\text{CDCl}_3$ )  $\delta$  8.98 (dd,  $J = 4.1, 1.6$  Hz, 1H), 8.53 (dd,  $J = 8.6, 1.6$  Hz, 1H), 7.70 (d,  $J = 8.2$  Hz, 1H), 7.59 (d,  $J = 16.0$  Hz, 1H), 7.53 – 7.43 (m, 4H), 7.11 – 7.00 (m, 3H), 5.53 (s, 2H), 5.22 (s, 2H), 3.60 (s, 3H), 3.51 (s, 3H).

#### (E)-5-(2-(8-(methoxymethoxy)quinolin-5-yl)vinyl)benzene-1,3-diol (**9d**)

Diethyl ((8-(methoxymethoxy)quinolin-5-yl)methyl)phosphonate **8a** was treated with 3,5-bis(methoxymethoxy)benzaldehyde **5** according to general procedure to give the desired product **9d** as a yellow oil, 31% yield;  $^1\text{H NMR}$  (400 MHz,  $\text{CDCl}_3$ )  $\delta$  8.99 (dd,  $J = 4.1, 1.6$  Hz, 1H), 8.53 (dd,  $J = 8.6, 1.6$  Hz, 1H), 7.74 – 7.64 (m, 2H), 7.49 (dd,  $J = 8.6, 4.1$  Hz, 1H), 7.45 (d,  $J = 8.2$  Hz, 1H), 7.01 (d,  $J = 15.9$  Hz, 1H), 6.93 (d,  $J = 2.2$  Hz, 2H), 6.70 (t,  $J = 2.2$  Hz, 1H), 5.54 (s, 2H), 5.22 (s, 4H), 3.60 (s, 3H), 3.52 (s, 6H).

#### (E)-4-(2-(8-(methoxymethoxy)-2-methylquinolin-5-yl)vinyl)phenol (**9e**)

Diethyl ((8-(methoxymethoxy)-2-methylquinolin-5-yl)methyl)phosphonate **8b** was treated with 4-(methoxymethoxy)benzaldehyde **2** according to general procedure to give the desired product **9e** as a yellow solid, 41% yield;  $^1\text{H NMR}$  (400 MHz,  $\text{CDCl}_3$ )  $\delta$  8.40 (d,  $J = 8.7$  Hz, 1H), 7.63 (d,  $J = 8.2$  Hz, 1H), 7.57 (d,  $J = 16.0$  Hz, 1H), 7.50 (d,  $J = 8.6$  Hz, 2H), 7.43 (d,  $J = 8.2$  Hz, 1H), 7.34 (d,  $J = 8.7$  Hz, 1H), 7.06 (d,  $J = 8.6$  Hz, 2H), 7.02 (d,  $J = 16.0$  Hz, 1H), 5.52 (s, 2H), 5.21 (s, 2H), 3.60 (s, 3H), 3.50 (s, 3H), 2.80 (s, 3H).

#### (E)-8-(methoxymethoxy)-5-(3,4,5-trimethoxystyryl)quinoline (**9f**)

Diethyl ((8-(methoxymethoxy)quinolin-5-yl)methyl)phosphonate **8a** was treated with 3,4,5-trimethoxybenzaldehyde according to general procedure to give the desired product **9f** as a yellow solid,

50% yield; <sup>1</sup>H NMR (400 MHz, CDCl<sub>3</sub>) δ 8.99 (d, *J* = 3.9 Hz, 1H), 8.54 (d, *J* = 8.6 Hz, 1H), 7.70 (d, *J* = 8.2 Hz, 1H), 7.60 (d, *J* = 15.9 Hz, 1H), 7.49 (dd, *J* = 8.5, 4.0 Hz, 1H), 7.45 (d, *J* = 8.2 Hz, 1H), 7.01 (d, *J* = 15.8 Hz, 1H), 6.80 (s, 2H), 5.54 (s, 2H), 3.95 (s, 6H), 3.89 (s, 3H), 3.60 (s, 3H).

#### 1.6 General procedure for the preparation of 10

A solution of compound **9** (0.5 mmol) in methanol (5 mL) was treated with 6 M HCl (0.5 mL), and the mixture was refluxed for 3 h. The solvent was removed by evaporation, and the residue was neutralised by saturated aqueous NaHCO<sub>3</sub> and extracted with ethyl acetate. The ethyl acetate layer was washed with water and brine and dried over Na<sub>2</sub>SO<sub>4</sub>. The solvent was removed by evaporation, and the residue was purified by flash chromatography on silica gel with petrol/ethyl acetate (1:1) as the elution solvent to afford the desired product **10**.

##### (E)-5-(4-(dimethylamino)styryl)quinolin-8-ol (10a)

Yellow solid, 87% yield, m.p.=173.4-174.2°C; <sup>1</sup>H NMR (400 MHz, CDCl<sub>3</sub>) δ 8.79 (d, *J* = 4.2 Hz, 1H), 8.57 (d, *J* = 8.6 Hz, 1H), 7.72 (d, *J* = 8.1 Hz, 1H), 7.55 – 7.43 (m, 4H), 7.19 (d, *J* = 8.0 Hz, 1H), 7.02 (d, *J* = 15.8 Hz, 1H), 6.75 (d, *J* = 8.6 Hz, 2H), 3.00 (s, 6H). <sup>13</sup>C NMR (101 MHz, CDCl<sub>3</sub>) δ 151.30, 150.19, 147.57, 138.27, 132.80, 130.59, 127.54 (2C), 126.73, 126.44, 126.10, 124.28, 121.45, 119.53, 112.51 (2C), 110.05, 40.48. HRMS (ESI) *m/z* [M+H]<sup>+</sup> calcd for C<sub>19</sub>H<sub>18</sub>N<sub>2</sub>O, 291.1492. found, 291.1506; Purity: 98.4% (by HPLC).

##### (E)-5-(4-(diethylamino)styryl)quinolin-8-ol (10b)

Yellow solid, 82% yield, m.p.=137.5-138.0°C; <sup>1</sup>H NMR (400 MHz, CDCl<sub>3</sub>) δ 8.79 (d, *J* = 3.7 Hz, 1H), 8.56 (d, *J* = 8.4 Hz, 1H), 7.71 (d, *J* = 8.0 Hz, 1H), 7.52 – 7.39 (m, 4H), 7.19 (d, *J* = 8.0 Hz, 1H), 7.00 (d, *J* = 15.9 Hz, 1H), 6.70 (d, *J* = 8.7 Hz, 2H), 3.40 (q, *J* = 7.1 Hz, 4H), 1.20 (t, *J* = 7.1 Hz, 6H). <sup>13</sup>C NMR (101 MHz, CDCl<sub>3</sub>) δ 151.20, 147.55, 147.47, 138.28, 132.83, 130.70, 127.80 (2C), 126.90, 126.44, 125.04, 124.17, 121.41, 118.88, 111.79 (2C), 110.08, 44.44, 12.65. HRMS (ESI) *m/z* [M+H]<sup>+</sup> calcd for C<sub>21</sub>H<sub>22</sub>N<sub>2</sub>O, 319.1805. found, 319.1821; Purity: 97.4% (by HPLC).

##### (E)-5-(4-hydroxystyryl)quinolin-8-ol (10c)

Yellow solid, 91% yield, m.p.=199.1-200.0°C; <sup>1</sup>H NMR (400 MHz, CDCl<sub>3</sub>) δ 8.80 (d, *J* = 4.1 Hz, 1H), 8.55 (d, *J* = 8.6 Hz, 1H), 7.73 (d, *J* = 8.0 Hz, 1H), 7.55 (d, *J* = 16.0 Hz, 1H), 7.52 – 7.49 (m, 1H), 7.47 (d, *J* = 8.3 Hz, 2H), 7.20 (d, *J* = 8.0 Hz, 1H), 7.02 (d, *J* = 16.0 Hz, 1H), 6.87 (d, *J* = 8.3 Hz, 2H). <sup>13</sup>C NMR (101 MHz, DMSO) δ 157.09, 152.59, 147.91, 138.28, 132.66, 129.15, 128.62 (2C), 127.94, 126.41, 125.32, 123.72, 121.61, 120.35, 115.44 (2C), 111.37. HRMS (ESI) *m/z* [M-H]<sup>-</sup> calcd for C<sub>17</sub>H<sub>13</sub>NO<sub>2</sub>, 262.0874. found, 262.0871; Purity: 97.8% (by HPLC).

##### (E)-5-(2-(8-hydroxyquinolin-5-yl)vinyl)benzene-1,3-diol (10d)

Red solid, 18% yield, m.p.=222.6-223.4°C; <sup>1</sup>H NMR (400 MHz, DMSO) δ 9.91 (s, 1H), 9.24 (s, 2H), 8.88 (s, 1H), 8.79 (d, *J* = 8.4 Hz, 1H), 7.83 (d, *J* = 8.0 Hz, 1H), 7.73 (d, *J* = 16.0 Hz, 1H), 7.60 (d, *J* = 7.4 Hz, 1H), 7.12 (d, *J* = 8.0 Hz, 1H), 7.00 (d, *J* = 16.0 Hz, 1H), 6.55 (s, 2H), 6.18 (s, 1H). <sup>13</sup>C NMR (101 MHz, DMSO) δ 158.46 (2C), 153.06, 147.97, 139.18, 138.26, 132.54, 129.65, 126.50, 124.72, 124.42, 123.09, 121.79, 111.36, 104.82 (2C), 102.15, 40.11, 39.90, 39.69, 39.48, 39.27, 39.06, 38.85. HRMS (ESI) *m/z* [M-H]<sup>-</sup> calcd for C<sub>17</sub>H<sub>13</sub>NO<sub>3</sub>, 278.0823. found, 278.0837; Purity: 98.0% (by HPLC).

##### (E)-5-(4-hydroxystyryl)-2-methylquinolin-8-ol (10e)

Yellow solid, 90% yield, m.p.=161.5-162.3°C; <sup>1</sup>H NMR (400 MHz, CDCl<sub>3</sub>) δ 8.42 (d, *J* = 8.7 Hz, 1H), 7.65 (d, *J* = 8.0 Hz, 1H), 7.52 (d, *J* = 15.9 Hz, 1H), 7.46 (d, *J* = 8.4 Hz, 2H), 7.35 (d, *J* = 8.7 Hz, 1H), 7.16 (d, *J* = 8.0 Hz, 1H), 7.01 (d, *J* = 15.9 Hz, 1H), 6.86 (d, *J* = 8.5 Hz, 2H), 2.74 (s, 3H). <sup>13</sup>C NMR (101 MHz, DMSO) δ 157.07, 156.41, 151.76, 137.60, 132.74, 128.90, 128.65, 127.91 (2C), 125.19, 124.59, 122.60, 122.39, 120.48, 115.44 (2C), 111.11, 24.46. HRMS (ESI) *m/z* [M-H]<sup>-</sup> calcd for C<sub>18</sub>H<sub>15</sub>NO<sub>2</sub>, 276.1030. found, 276.1016; Purity: 98.6% (by HPLC).

##### (E)-5-(3,4,5-trimethoxystyryl)quinolin-8-ol (10f)

Yellow solid, 87% yield; LC/MS (ESI) *m/z*: [M+H]<sup>+</sup> 338.1. <sup>1</sup>H NMR (400 MHz, CDCl<sub>3</sub>) δ 8.82 (d, *J* = 3.9 Hz, 1H), 8.56 (d, *J* = 8.5 Hz, 1H), 7.74 (d, *J* = 8.0 Hz, 1H), 7.58 (d, *J* = 15.9 Hz, 1H), 7.51 (dd, *J* = 8.5, 4.1 Hz, 1H), 7.21 (d,

$J = 8.0$  Hz, 1H), 7.01 (d,  $J = 15.9$  Hz, 1H), 6.79 (s, 2H), 3.94 (s, 6H), 3.89 (s, 3H).

### 1.7 General procedure for the preparation of 12

Compound **12** was prepared according to a reported procedure<sup>5, 6</sup> with modifications. A mixture of 2-methyl-8-hydroxyquinoline (0.358 g, 2.3 mmol), benzaldehyde (2.3 mmol) and acetic anhydride (8 mL) was heated at 130° C under a nitrogen atmosphere for 24 h (TLC monitoring). The reaction was quenched by pouring into ice-water (50 mL) with stirring. The solids were filtered and dried, and the crude products were purified by recrystallisation from petrol / ethyl acetate.

#### (E)-2-(2-(8-acetoxyquinolin-2-yl)vinyl)phenyl acetate (12a)

Yellow solid, 75% yield; <sup>1</sup>H NMR (400 MHz, CDCl<sub>3</sub>) δ 8.14 (d,  $J = 8.5$  Hz, 1H), 7.80 – 7.72 (m, 2H), 7.68 (d,  $J = 8.0$  Hz, 1H), 7.59 (d,  $J = 8.6$  Hz, 1H), 7.48 (t,  $J = 7.8$  Hz, 1H), 7.43 (d,  $J = 7.4$  Hz, 1H), 7.38 – 7.27 (m, 3H), 7.13 (d,  $J = 7.9$  Hz, 1H), 2.54 (s, 3H), 2.41 (s, 3H).

#### (E)-3-(2-(8-acetoxyquinolin-2-yl)vinyl)phenyl acetate(12b)

Yellow solid, 56% yield; <sup>1</sup>H NMR (400 MHz, CDCl<sub>3</sub>) δ 8.12 (d,  $J = 8.6$  Hz, 1H), 7.69 – 7.65 (m, 1H), 7.61 (d,  $J = 8.8$  Hz, 2H), 7.49 – 7.38 (m, 4H), 7.32 (d,  $J = 16.1$  Hz, 2H), 7.06 (dd,  $J = 7.9, 1.1$  Hz, 1H), 2.56 (s, 3H), 2.33 (s, 3H).

#### (E)-2-(4-bromostyryl)quinolin-8-yl acetate (12c)

Yellow solid, 62% yield; <sup>1</sup>H NMR (400 MHz, CDCl<sub>3</sub>) δ 8.14 (d,  $J = 8.6$  Hz, 1H), 7.68 (d,  $J = 6.9$  Hz, 1H), 7.65 – 7.57 (m, 2H), 7.65 – 7.40 (m, 6H), 7.32 (d,  $J = 16.2$  Hz, 1H), 2.56 (s, 3H).

#### (E)-2-(4-nitrostyryl)quinolin-8-yl acetate (12d)

Yellow solid, 85% yield; <sup>1</sup>H NMR (400 MHz, CDCl<sub>3</sub>) δ 8.26 (d,  $J = 8.4$  Hz, 2H), 8.19 (d,  $J = 8.6$  Hz, 1H), 7.77 – 7.69 (m, 4H), 7.67 (d,  $J = 8.6$  Hz, 1H), 7.55 – 7.44 (m, 3H), 2.57 (s, 3H).

#### (E)-4-(2-(8-acetoxyquinolin-2-yl)vinyl)phenyl acetate (12e)

Yellow solid, 65% yield; LC/MS (ESI) m/z: [M+H]<sup>+</sup> 306.1. <sup>1</sup>H NMR (400 MHz, CDCl<sub>3</sub>) δ 8.13 (d,  $J = 8.6$  Hz, 1H), 7.71 – 7.59 (m, 5H), 7.47 (t,  $J = 7.7$  Hz, 1H), 7.44 – 7.39 (m, 1H), 7.29 (d,  $J = 16.2$  Hz, 1H), 7.14 (d,  $J = 8.6$  Hz, 2H), 2.56 (s, 3H), 2.32 (s, 3H).

### 1.8 General procedure for the preparation of 13

Compound **13** was prepared according to a reported procedure<sup>6</sup> with modifications. Compound **12a** (0.8 mol) was dissolved in DMF (8 mL) and concentrated hydrochloric acid (0.8 mL) was added to the solution. The mixture was heated at 100° C for 3 h before the addition of ice-water (20 mL) to the mixture. The pH of the mixture was adjusted to 7-8 with saturated aqueous NaHCO<sub>3</sub>. The mixture was then extracted with ethyl acetate, washed with brine and dried over Na<sub>2</sub>SO<sub>4</sub>. Filtration and evaporation of the ethyl acetate afforded a solid that was purified by flash chromatography on silica gel with petrol / ethyl acetate (5:1:1:1) as the elution solvent to afford the desired product **13**.

#### (E)-2-(2-hydroxystyryl)quinolin-8-ol (13a)

Yellow solid, 82% yield, m.p.=188.5-189.3°C; <sup>1</sup>H NMR (400 MHz, CDCl<sub>3</sub>) δ 8.11 (d,  $J = 8.6$  Hz, 1H), 8.00 (d,  $J = 16.4$  Hz, 1H), 7.67 (t,  $J = 8.3$  Hz, 2H), 7.42 (d,  $J = 7.3$  Hz, 1H), 7.38 (d,  $J = 6.8$  Hz, 1H), 7.29 (d,  $J = 8.2$  Hz, 1H), 7.24 – 7.18 (m, 1H), 7.16 (d,  $J = 7.6$  Hz, 1H), 7.00 (t,  $J = 7.5$  Hz, 1H), 6.84 (d,  $J = 8.0$  Hz, 1H). <sup>13</sup>C NMR (101 MHz, DMSO) δ 155.88, 154.22, 152.83, 138.18, 136.33, 130.16, 129.61, 128.23, 128.01, 127.55, 126.78, 123.14, 120.28, 119.41, 117.58, 116.07, 111.25. HRMS (ESI) m/z [M+H]<sup>+</sup> calcd for C<sub>17</sub>H<sub>13</sub>NO<sub>2</sub>, 264.1019. found, 264.1021; Purity: 99.6% (by HPLC).

#### (E)-2-(3-hydroxystyryl)quinolin-8-ol (13b)

Yellow solid, 80% yield, m.p.=141.5-142.5°C; <sup>1</sup>H NMR (400 MHz, DMSO) δ 9.56 (s, 2H), 8.28 (d,  $J = 8.6$  Hz, 1H), 8.02 (d,  $J = 16.2$  Hz, 1H), 7.79 (d,  $J = 8.6$  Hz, 1H), 7.41 – 7.34 (m, 1H), 7.37 – 7.33 (m, 2H), 7.24 (t,  $J = 7.8$  Hz, 1H), 7.15 (d,  $J = 7.7$  Hz, 1H), 7.12 – 7.06 (m, 2H), 6.77 (dd,  $J = 7.9, 1.6$  Hz, 1H). <sup>13</sup>C NMR (101 MHz,

DMSO)  $\delta$  157.69, 153.39, 152.88, 138.09, 137.75, 136.41, 134.52, 129.80, 127.77, 127.62, 126.98, 120.88, 118.14, 117.51, 115.82, 113.63, 111.16. HRMS (ESI)  $m/z$  [M-H]<sup>-</sup> calcd for C<sub>17</sub>H<sub>13</sub>NO<sub>2</sub>, 262.0874. found, 262.0871; Purity: 99.6% (by HPLC).

**(E)-2-(4-bromostyryl)quinolin-8-ol (13c)**

Yellow solid, 90% yield, m.p.=135.7-136.3°C; <sup>1</sup>H NMR (400 MHz, CDCl<sub>3</sub>)  $\delta$  8.12 (d,  $J$  = 8.6 Hz, 1H), 7.64 (t,  $J$  = 13.0 Hz, 2H), 7.56 – 7.53 (m, 2H), 7.52 – 7.47 (m, 2H), 7.44 – 7.38 (m, 1H), 7.36 – 7.28 (m, 2H), 7.17 (dd,  $J$  = 7.6, 1.2 Hz, 1H). <sup>13</sup>C NMR (101 MHz, CDCl<sub>3</sub>)  $\delta$  153.20, 152.06, 138.03, 136.51, 135.32, 132.97, 132.00 (2C), 128.74, 128.66 (2C), 127.54, 127.47, 122.67, 120.40, 117.69, 110.24. HRMS (ESI)  $m/z$  [M+H]<sup>+</sup> calcd for C<sub>17</sub>H<sub>12</sub>BrNO, 326.0175. found, 326.0190; Purity: 99.1% (by HPLC).

**(E)-2-(4-nitrostyryl)quinolin-8-ol (13d)**

Yellow solid, 93% yield, m.p.=198.5-199.4°C; <sup>1</sup>H NMR (400 MHz, CDCl<sub>3</sub>)  $\delta$  8.28 (d,  $J$  = 8.3 Hz, 2H), 8.18 (d,  $J$  = 8.6 Hz, 1H), 7.82 – 7.74 (m, 3H), 7.66 (d,  $J$  = 8.6 Hz, 1H), 7.53 – 7.41 (m, 2H), 7.33 (d,  $J$  = 8.4 Hz, 1H), 7.20 (d,  $J$  = 7.5 Hz, 1H). <sup>13</sup>C NMR (101 MHz, CDCl<sub>3</sub>)  $\delta$  152.32, 152.17, 147.48, 142.77, 138.10, 136.79, 132.31, 131.58, 128.05, 127.85, 127.66 (2C), 124.22 (2C), 120.67, 117.76, 110.49. HRMS (ESI)  $m/z$  [M-H]<sup>-</sup> calcd for C<sub>17</sub>H<sub>12</sub>N<sub>2</sub>O<sub>3</sub>, 291.0775. found, 291.0762; Purity: 98.5% (by HPLC).

**(E)-2-(4-hydroxystyryl)quinolin-8-ol (13e)**

Yellow solid, two steps yield 41% yield, m.p.=168.5-169.7°C; <sup>1</sup>H NMR (400 MHz, CDCl<sub>3</sub>)  $\delta$  8.10 (d,  $J$  = 8.6 Hz, 1H), 7.67 (d,  $J$  = 16.3 Hz, 1H), 7.61 (d,  $J$  = 8.7 Hz, 1H), 7.54 (d,  $J$  = 8.2 Hz, 2H), 7.38 (t,  $J$  = 7.8 Hz, 1H), 7.29 (d,  $J$  = 8.3 Hz, 1H), 7.23 (s, 1H), 7.20 – 7.14 (m, 1H), 6.89 (d,  $J$  = 8.3 Hz, 2H). <sup>13</sup>C NMR (101 MHz, DMSO)  $\delta$  158.21, 153.96, 152.71, 138.08, 136.26, 134.50, 128.74, 127.51, 127.37, 126.60, 124.66, 120.62, 117.51, 115.75, 111.04. HRMS (ESI)  $m/z$  [M+H]<sup>+</sup> calcd for C<sub>17</sub>H<sub>13</sub>NO<sub>2</sub>, 264.1019. found, 264.020; Purity: 99.5% (by HPLC).

**(E)-2-(3,5-dimethoxystyryl)quinolin-8-ol (13f)**

Yellow solid, two steps yield 38% yield; LC/MS (ESI)  $m/z$ : [M+H]<sup>+</sup> 308.1. <sup>1</sup>H NMR (400 MHz, CDCl<sub>3</sub>)  $\delta$  8.12 (d,  $J$  = 8.6 Hz, 1H), 7.65 (d,  $J$  = 6.2 Hz, 1H), 7.61 (d,  $J$  = 7.9 Hz, 1H), 7.44 – 7.36 (m, 1H), 7.34 (s, 1H), 7.32 – 7.29 (m, 1H), 7.17 (dd,  $J$  = 7.6, 1.1 Hz, 1H), 6.79 (d,  $J$  = 2.2 Hz, 2H), 6.47 (s, 1H), 3.86 (s, 6H).

**(E)-2-(3,4,5-trimethoxystyryl)quinolin-8-ol (13g)**

Yellow solid, 86% yield; LC/MS (ESI)  $m/z$ : [M+H]<sup>+</sup> 338.1. <sup>1</sup>H NMR (400 MHz, CDCl<sub>3</sub>)  $\delta$  8.12 (d,  $J$  = 8.6 Hz, 1H), 7.66 (d,  $J$  = 11.4 Hz, 1H), 7.63 (d,  $J$  = 3.8 Hz, 1H), 7.40 (t,  $J$  = 7.9 Hz, 1H), 7.30 (d,  $J$  = 8.0 Hz, 1H), 7.26 (d,  $J$  = 11.4 Hz, 1H), 7.17 (d,  $J$  = 7.6 Hz, 1H), 6.88 (s, 2H), 3.96 (s, 6H), 3.90 (s, 3H).

**1.9 General procedure for the preparation of 10g and 13h-13i**

BBr<sub>3</sub> (5-7.5 eq.) was added dropwise at -78°C under nitrogen to a solution of dried CH<sub>2</sub>Cl<sub>2</sub> containing compound **10f** or **13f-13g** (0.5 mmol). The resulting solution was slowly warmed to room temperature and stirred overnight. After monitoring the reaction progress by TLC, water was added slowly. The mixture was neutralised by saturated aqueous NaHCO<sub>3</sub> and extracted with ethyl acetate. The ethyl acetate layer was washed with water then dried over Na<sub>2</sub>SO<sub>4</sub>. The solvent was removed by evaporation, and the residue was purified by flash chromatography on silica gel with CH<sub>2</sub>Cl<sub>2</sub>/methanol (10:1-5:1) as the elution solvent to afford the desired product **10g** or **13h-13i**.

**(E)-5-(2-(8-hydroxyquinolin-5-yl)vinyl)benzene-1,2,3-triol (10g)**

Red solid, 53% yield, m.p.=218.25-219.1°C; <sup>1</sup>H NMR (400 MHz, CD<sub>3</sub>OD)  $\delta$  8.80 (dd,  $J$  = 4.1, 1.3 Hz, 1H), 8.61 (dd,  $J$  = 8.6, 1.3 Hz, 1H), 7.69 (d,  $J$  = 8.1 Hz, 1H), 7.56 – 7.47 (m, 2H), 7.11 (d,  $J$  = 8.1 Hz, 1H), 6.88 (d,  $J$  = 15.9 Hz, 1H), 6.64 (s, 2H). <sup>13</sup>C NMR (101 MHz, DMSO)  $\delta$  154.16, 149.69, 147.92, 139.84, 135.18, 134.65, 131.95, 130.12, 128.23, 127.20, 125.85, 123.56, 122.14, 113.33, 107.73. HRMS (ESI)  $m/z$  [M+H]<sup>+</sup> calcd for C<sub>17</sub>H<sub>13</sub>NO<sub>4</sub>, 296.0717. found, 296.0717; Purity: 98.6% (by HPLC).

**(E)-5-(2-(8-hydroxyquinolin-2-yl)vinyl)benzene-1,3-diol (13h)**

Red solid, 63% yield, m.p.=229.2-229.9°C; <sup>1</sup>H NMR (400 MHz, DMSO)  $\delta$  9.39 (s, 1H), 8.25 (d,  $J$  = 8.6 Hz, 1H),

7.89 (d,  $J = 16.2$  Hz, 1H), 7.77 (d,  $J = 8.6$  Hz, 1H), 7.43 – 7.32 (m, 2H), 7.27 (d,  $J = 16.2$  Hz, 1H), 7.08 (dd,  $J = 7.0, 1.6$  Hz, 1H), 6.58 (d,  $J = 1.6$  Hz, 2H), 6.25 (s, 1H).  $^{13}\text{C}$  NMR (101 MHz, DMSO)  $\delta$  160.49, 160.35, 155.34, 154.62, 140.03, 139.91, 138.25, 136.72, 129.45 (2C), 128.82, 122.67, 119.42, 112.99, 107.22, 107.14, 105.08. HRMS (ESI)  $m/z$   $[\text{M}+\text{H}]^+$  calcd for  $\text{C}_{17}\text{H}_{13}\text{NO}_3$ , 280.0968. found, 280.0971; Purity: 98.7% (by HPLC).

#### **(E)-5-(2-(8-hydroxyquinolin-2-yl)vinyl)benzene-1,2,3-triol (13i)**

Red solid, 51% yield, m.p.=194.75-195.3°C;  $^1\text{H}$  NMR (400 MHz, DMSO)  $\delta$  8.19 (d,  $J = 8.6$  Hz, 1H), 7.79 (d,  $J = 16.1$  Hz, 1H), 7.72 (d,  $J = 8.6$  Hz, 1H), 7.38 – 7.27 (m, 2H), 7.05 (dd,  $J = 15.0, 9.0$  Hz, 2H), 6.66 (s, 2H).  $^{13}\text{C}$  NMR (101 MHz, DMSO)  $\delta$  155.85, 154.47, 147.93, 139.90, 138.06, 137.14, 136.40, 129.21, 128.90, 128.43, 126.59, 122.42, 119.40, 112.87, 108.33. HRMS (ESI)  $m/z$   $[\text{M}+\text{H}]^+$  calcd for  $\text{C}_{17}\text{H}_{13}\text{NO}_4$ , 296.0917. found, 296.0918; Purity: 97.1% (by HPLC).

## **2 Biological Assays**

### **2.1 ThT assay<sup>7</sup>**

A hexafluoro-2-propanol (HFIP) pretreated  $\text{A}\beta_{1-42}$  sample (Sigma, CA, US) was dissolved in ammonium hydroxide (1% v/v) to give a stock solution (2000 $\mu\text{M}$ ) that was aliquoted into small samples and stored at  $-80^\circ\text{C}$ . For the inhibition of self-mediated  $\text{A}\beta_{1-42}$  aggregation experiment, the  $\text{A}\beta_{1-42}$  stock solution was diluted with 50 mM phosphate buffer (pH 7.4) to 50 $\mu\text{M}$  before use. A mixture of the peptide (10 $\mu\text{L}$ , 25 $\mu\text{M}$  and final concentration) with or without the test compound (10 $\mu\text{L}$ , 20 $\mu\text{M}$  and final concentration) was incubated at  $37^\circ\text{C}$  for 48 h. Blanks using 50 mM phosphate buffer (pH 7.4) instead of  $\text{A}\beta_{1-42}$  in the presence or absence of compounds were also carried out. Then, the samples were diluted to a final volume of 200  $\mu\text{L}$  with 50 mM glycine-NaOH buffer (pH 8.0) containing thioflavin T (5  $\mu\text{M}$ ). The fluorescence intensity was recorded 5 min later ( $\lambda_{\text{ex}} = 450$  nm,  $\lambda_{\text{em}} = 485$  nm). The percentage of inhibition of aggregation was calculated according to the following formula:  $(1 - F_{\text{Sample}} / F_{\text{Control}}) \times 100$ , where  $F_{\text{Sample}}$  and  $F_{\text{Control}}$  are the fluorescence intensity of  $\text{A}\beta_{1-42}$  in the presence and absence of inhibitors after subtracting the background, respectively.

For the inhibition of the copper(II)-induced  $\text{A}\beta_{1-42}$  aggregation experiment, the  $\text{A}\beta_{1-42}$  stock solution was diluted in 20 $\mu\text{M}$  HEPES (pH 6.6) with 150  $\mu\text{M}$  NaCl. The mixture of the peptide (10  $\mu\text{L}$ , 25  $\mu\text{M}$  and final concentration) with or without copper(II) (10  $\mu\text{L}$ , 25  $\mu\text{M}$  and final concentration) and the test compound (10  $\mu\text{L}$ , 50  $\mu\text{M}$  and final concentration) was incubated at  $37^\circ\text{C}$  for 24 h. Then, 20  $\mu\text{L}$  of the sample was diluted to a final volume of 200 $\mu\text{L}$  with 50 mM glycine-NaOH buffer (pH 8.0) containing thioflavin-T (5 $\mu\text{M}$ ). The detection method was the same as the self-mediated  $\text{A}\beta_{1-42}$  aggregation experiment.

For the disaggregation of the self-mediated  $\text{A}\beta_{1-42}$  fibrils experiment, the  $\text{A}\beta_{1-42}$  stock solution was diluted with 10 mM phosphate buffer (pH 7.4). The peptide (15  $\mu\text{L}$  and 50  $\mu\text{M}$ ) was incubated at  $37^\circ\text{C}$  for 24 h. The test compound (15  $\mu\text{L}$  and 50  $\mu\text{M}$ ) was then added and incubated at  $37^\circ\text{C}$  for another 24 h. Then, 20  $\mu\text{L}$  of the sample was diluted to a final volume of 200  $\mu\text{L}$  with 50 mM glycine-NaOH buffer (pH 8.0) containing thioflavin-T (5  $\mu\text{M}$ ). The detection method, was the same as above.

For the disaggregation of the copper(II)-induced  $\text{A}\beta_{1-42}$  fibrils experiment, the  $\text{A}\beta_{1-42}$  stock solution was diluted in 20  $\mu\text{M}$  HEPES (pH 6.6) with 150  $\mu\text{M}$  NaCl. The mixture of the peptide (10  $\mu\text{L}$ , 25  $\mu\text{M}$  and final concentration) with copper(II) (10  $\mu\text{L}$ , 25  $\mu\text{M}$  and final concentration) was incubated at  $37^\circ\text{C}$  for 24 h. The test compound (10  $\mu\text{L}$ , 50  $\mu\text{M}$  and final concentration) was then added and incubated at  $37^\circ\text{C}$  for another 24 h.<sup>30</sup> Then, 20  $\mu\text{L}$  of the sample was diluted to a final volume of 200  $\mu\text{L}$  with 50 mM glycine-NaOH buffer (pH 8.0) containing thioflavin-T (5  $\mu\text{M}$ ). The detection method was the same as above.

### **2.2 TEM assay<sup>8-10</sup>**

For the metal-free experiment, the  $\text{A}\beta_{1-42}$  stock solution was diluted with 10 mM phosphate buffer (pH 7.4). For the copper(II)-induced experiment, the  $\text{A}\beta_{1-42}$  stock solution was diluted with 20  $\mu\text{M}$  HEPES (pH 6.6) and 150  $\mu\text{M}$

NaCl. The sample preparation was the same as for the ThT assay. Aliquots (10  $\mu$ L) of the samples were placed on a carbon-coated copper/rhodium grid for 2 min. Each grid was stained with uranyl acetate (1%, 5 $\mu$ L) for 2 min. After draining off the excess staining solution, the specimen was transferred for imaging by transmission electron microscopy (JEOL JEM-1400). All compounds were solubilised in the buffer used for the experiment.

### 2.3 Oxygen radical absorbance capacity (ORAC-FL) assay<sup>11-13</sup>

The tested compound and fluorescein (FL) stock solution were diluted with 75 mM phosphate buffer (pH 7.4) to 10  $\mu$ M and 0.117  $\mu$ M, respectively. The solution of ( $\pm$ )-6-hydroxy-2,5,7,8-tetramethylchroman-2-carboxylic acid (Trolox) was diluted with the same buffer to 100, 80, 60, 50, 40, 20, and 10  $\mu$ M. The solution of 2,2'-azobis-(amidinopropane)dihydrochloride (AAPH) was prepared before the experiment by dissolving 108.4 mg AAPH in 10 mL 75 mM phosphate buffer (pH 7.4) to a final concentration of 40 mM. The mixture of the tested compound (20  $\mu$ L) and FL (120  $\mu$ L; 70 nM, final concentration) was pre-incubated for 10 min at 37°C, and then 60  $\mu$ L of the AAPH solution was added. The fluorescence was recorded every minute for 120 min (excitation, 485 nm; emission, 520 nm). A blank using phosphate buffer instead of the tested compound was also carried out. All reaction mixtures were prepared triple and at least three independent runs were performed for each sample. The Antioxidant curves (fluorescence versus time) were normalized to the curve of the blank. The area under the fluorescence decay curve (AUC) was calculated as following equation:

$$AUC = 1 + \sum_{i=1}^{i=120} (f_i/f_0)$$

Where  $f_0$  is the initial fluorescence reading at 0 min and  $f_i$  is the fluorescence reading at time  $i$ . The net AUC was calculated by the expression:  $AUC_{\text{sample}} - AUC_{\text{blank}}$ . Regression equations between net AUC and Trolox concentrations were calculated. ORAC-FL value for each sample were calculated by using the standard curve which means the ORAC-FL value of tested compound expressed as Trolox equivalents.

### 2.4 Metal chelation

The complexation studies were performed in HEPES buffer solution (20 mM, containing 150 mM NaCl, pH=7.4) at 298 K using a UV-vis spectrophotometer (SHIMADZC UV-2450PC) at wavelengths ranging from 200 to 650 nm. Compound **10c** was dissolved in DMSO and diluted with HEPES buffer solution (PH=7.4) to a concentration of 50  $\mu$ M. Then, 100  $\mu$ L of HEPES buffer solution and 100  $\mu$ L of metal solution (200  $\mu$ M of CuSO<sub>4</sub>, FeSO<sub>4</sub>, or ZnCl<sub>2</sub>) were added to the mixture containing 800  $\mu$ L of the test compound solution. The solution was incubated at 298 K for 10 min and the absorption spectra were recorded at 298 K in a 1 cm quartz cell using a blank containing 4  $\mu$ L DMSO in 996  $\mu$ L HEPES (pH=7.4). The blank absorption spectrum was subtracted from all of the absorption spectra.

The stoichiometry of the **10c**-copper(II) complex was determined by employing Job's method. A series of solutions were prepared in HEPES buffer with the condition that the sum of the concentrations of compound **10c** and copper(II) was constant in all samples and that the proportions of both them varied between 0 and 100%. The absorbance differences at 445 nm were plotted versus the mole fraction of copper(II).

### 2.5 Ascorbate studies

All of the solutions, except CuSO<sub>4</sub> (Milli-Q water only) and **10c** (dissolved in methanol and diluted in PBS), were mixed and diluted in a phosphate (20 mM), NaCl (100 mM) buffer (PBS) at pH 7.4 with a final sample volume of 200  $\mu$ L.<sup>14</sup> Each experiment was performed in triplicate. Hydroxyl radical production was measured as the conversion of CCA into 7-hydroxy-CCA ( $\lambda_{\text{excitation}} = 395$  nm,  $\lambda_{\text{emission}} = 450$  nm). The general order of addition was as follows: CCA [50  $\mu$ M], ligand [15  $\mu$ M] or copper [5  $\mu$ M], and then ascorbate [150  $\mu$ M]. All of the test solutions contained 1  $\mu$ M desferryl and 0.1% methanol.

### 2.6 In vitro Blood-Brain Barrier Permeation Assay



The brain penetration of the compounds was evaluated using a parallel artificial membrane permeation assay (PAMPA) similar to the procedure described by Di et al.<sup>15</sup> Commercial drugs were purchased from Sigma and Alfa Aesar. The porcine brain lipid (PBL) was obtained from Avanti Polar Lipids. The donor microplate (PVDF membrane, pore size 0.45 mm) and the acceptor microplate were obtained from Millipore. The 96-well UV plate (COSTAR®) was obtained from Corning Incorporated. The acceptor 96-well microplate was filled with 300  $\mu\text{L}$  of PBS/EtOH (7:3), and the filter membrane was impregnated with 4  $\mu\text{L}$  of PBL in dodecane (20  $\text{mg mL}^{-1}$ ). The compounds were dissolved in DMSO at 5  $\text{mg mL}^{-1}$  and diluted 50-fold in PBS/EtOH (7:3) to achieve a concentration of 100  $\text{mg mL}^{-1}$  before 200  $\mu\text{L}$  was added to the donor wells. The acceptor filter plate was carefully placed on the donor plate to form a sandwich, which was left undisturbed for 10 h at 25°C. After incubation, the donor plate was carefully removed, and the concentration of compounds in the acceptor wells was determined using the UV plate reader (Flexstation® 3). Every sample was analysed at five wavelengths in four wells and in at least three independent runs, and the results are given as the means  $\pm$  standard deviation. In each experiment, 13 quality control standards of known BBB permeability (Table S2) were included to validate the analysis set.  $P_e$  can be calculated from the following equation as reported by Faller et al.<sup>16</sup> and Sugano et

$$\text{al.}^{17} P_e = -\left(\frac{V_d \times V_a}{(V_d + V_a) A \times t}\right) \times \ln\left(1 - \frac{[\text{drug}]_{\text{acceptor}}}{[\text{drug}]_{\text{equilibrium}}}\right)$$

where  $V_d$  is the volume of donor well,  $V_a$  is the volume in acceptor well,  $A$  is the filter area,  $t$  is the permeation time,  $[\text{drug}]_{\text{acceptor}}$  is the absorbance of compound found in the acceptor well, and  $[\text{drug}]_{\text{equilibrium}}$  is the theoretical equilibrium absorbance.

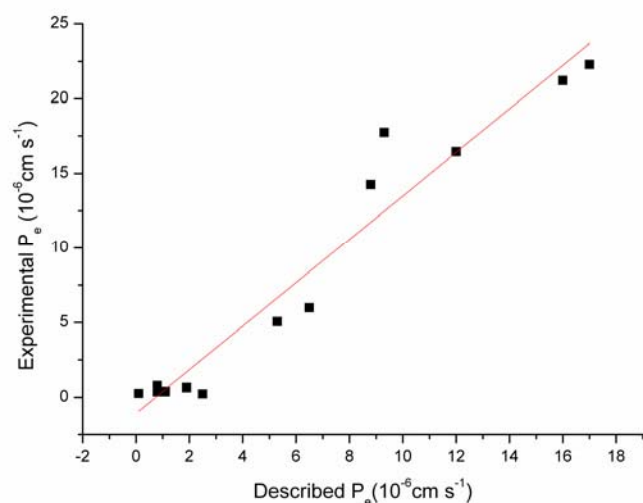

**Figure S1.** Lineal correlation between experimental and reported permeability of commercial drugs using the PAMPA-BBB assay.  $P_e(\text{exp.})=1.4574P_e(\text{bibl.}) - 1.0773$  ( $R^2=0.9427$ ).

**Table S1.** Ranges of Permeability of PAMPA-BBB Assays ( $P_e$ ,  $10^{-6} \text{ cm s}^{-1}$ )

|                                                |                   |
|------------------------------------------------|-------------------|
| Compounds of high BBB permeation (CNS+)        | $P_e > 4.7$       |
| Compounds of uncertain BBB permeation (CNS+/-) | $4.7 > P_e > 1.8$ |
| Compounds of low BBB permeation (CNS-)         | $P_e < 1.8$       |

**Table S2** Permeability ( $P_e \times 10^{-6} \text{ cm s}^{-1}$ ) in the PAMPA-BBB assay for 13 commercial drugs, used in the

#### Experiment Validation.

| Commercial drugs | Bibl <sup>a</sup> | PBS : EtOH (70 : 30) <sup>b</sup> |
|------------------|-------------------|-----------------------------------|
| testosterone     | 17                | 22.3 ± 1.4                        |
| verapamil        | 16                | 21.2 ± 1.9                        |
| desipramine      | 12                | 16.4 ± 1.2                        |
| progesterone     | 9.3               | 17.7 ± 1.2                        |
| promazine        | 8.8               | 14.3 ± 0.5                        |
| chlorpromazine   | 6.5               | 6.0 ± 0.3                         |
| clonidine        | 5.3               | 5.1 ± 0.3                         |
| piroxicam        | 2.5               | 0.24 ± 0.01                       |
| hydrocortisone   | 1.9               | 0.65 ± 0.01                       |
| lomefloxacin     | 1.1               | 0.37 ± 0.02                       |
| atnolol          | 0.8               | 0.78 ± 0.02                       |
| ofloxacin        | 0.8               | 0.37 ± 0.02                       |
| theophylline     | 0.1               | 0.26 ± 0.01                       |

<sup>a</sup> The data were taken from ref 10. <sup>b</sup> Data are the mean ± SD of three independent experiments.

### 2.7 Statistical Analysis

The results are expressed as the mean ± SD of at least three independent experiments. Data were subjected to one-way analysis of variance (ANOVA) followed by Dunnett's test. *P* values less than 0.05 were accepted to indicate the significance.

### 3 Acute Toxicity Assay

Twenty KM mice (22 days, 18-20 g), purchased from the laboratory animal center of Sun Yat-sen University (Guangzhou, China), were used to evaluate the acute toxicity of compound **10c**. Mice were maintained on a 12 h light/dark cycle (light from 07:00 to 19:00) at 20°C -22°C and 60-70% relative humidity. Sterile food and water were provided according to institutional guidelines. Prior to each experiment, mice were fasted overnight and allowed free access to water. Compound **10c** was dissolved in 0.5% carboxymethyl cellulose sodium (CMC-Na) salt solution and given via oral administration to different experimental groups. After administration of the compound, mice were observed continuously for the first 4 h for any abnormal behavior and mortality changes, intermittently for the next 24 h and occasionally thereafter for 14 days for the onset of any delayed effects. All animals were sacrificed on the 14th day after drug administration and macroscopically evaluated for possible damage to the heart, liver, and kidneys.<sup>18</sup>

### 4 NMR spectra of compounds 10a-10e, 10g, 13a-e and 13h-13i

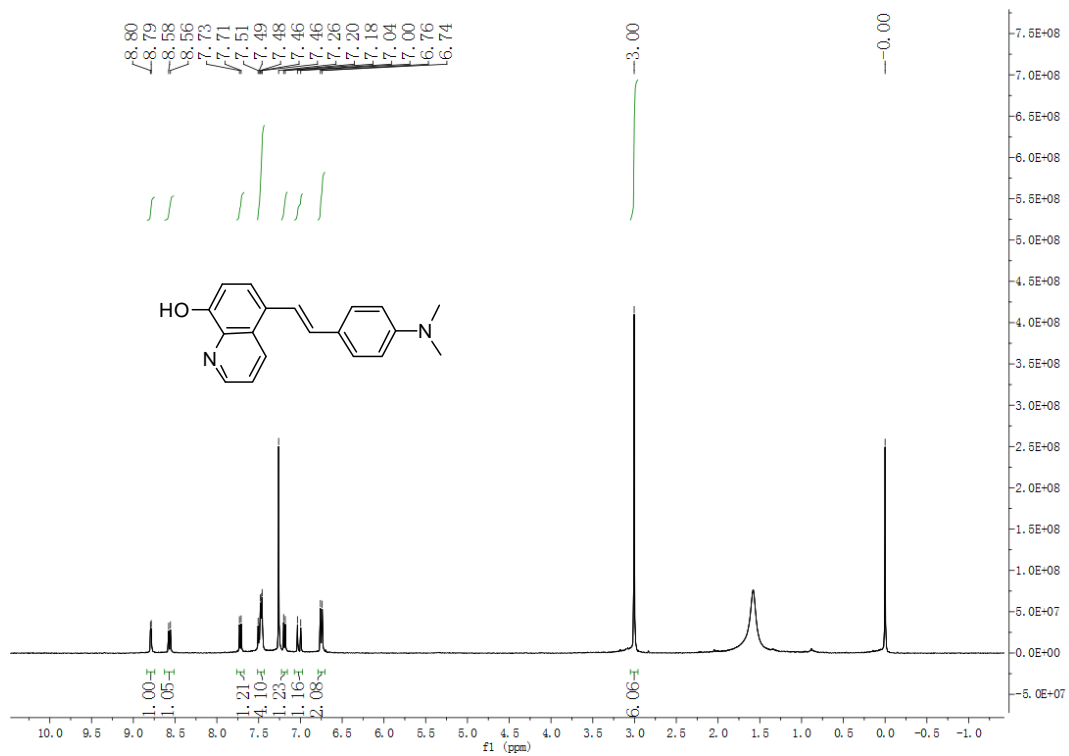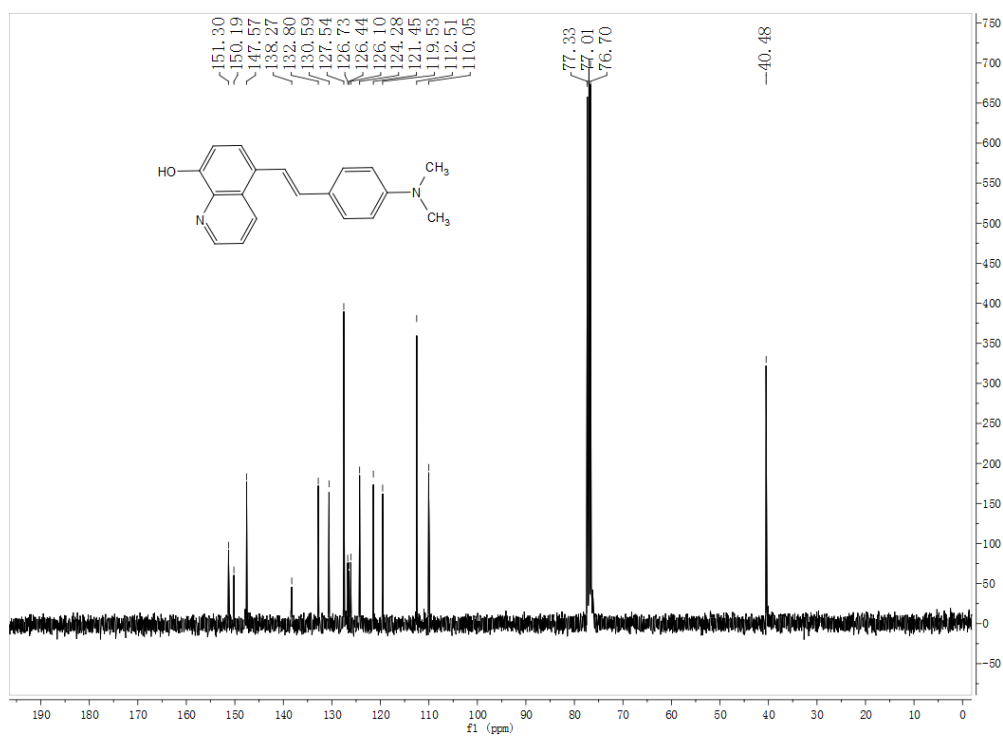

NMR spectra of compounds **10a**

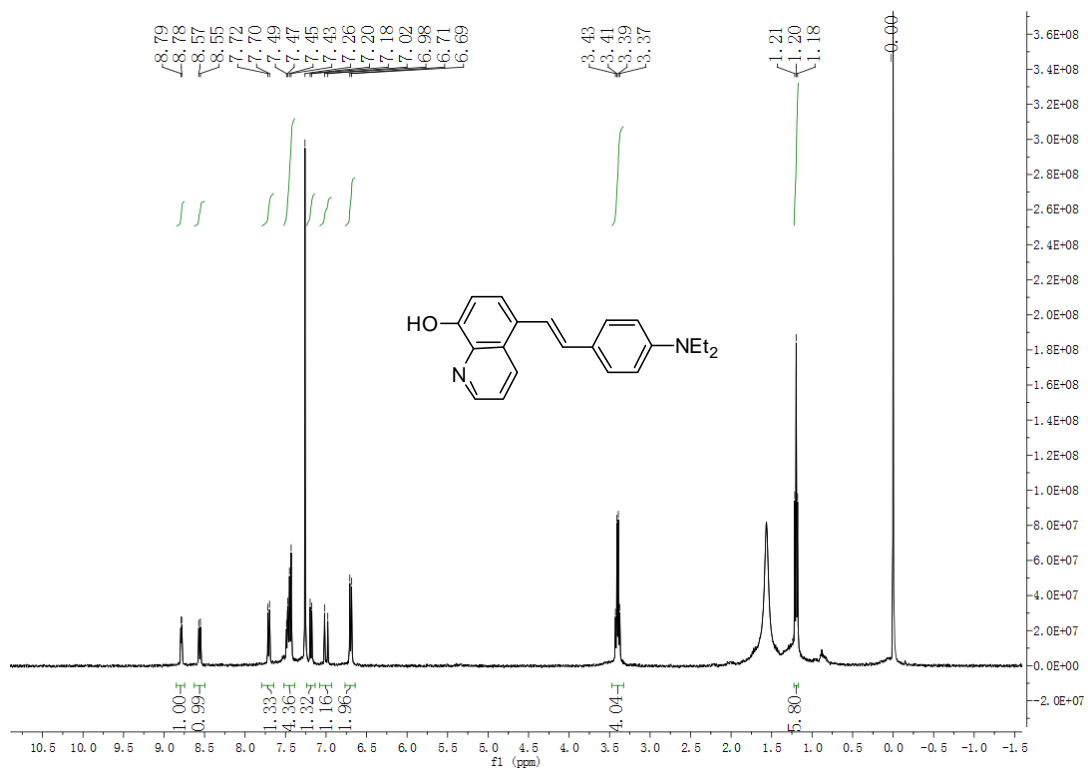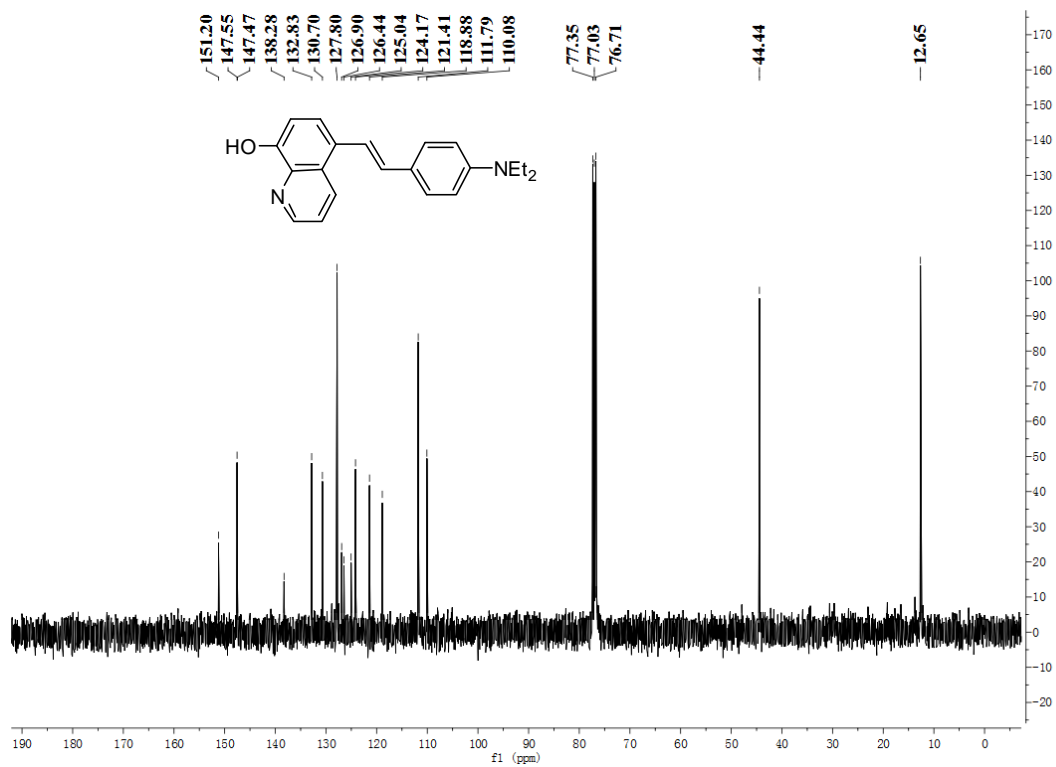

NMR spectra of compounds **10b**

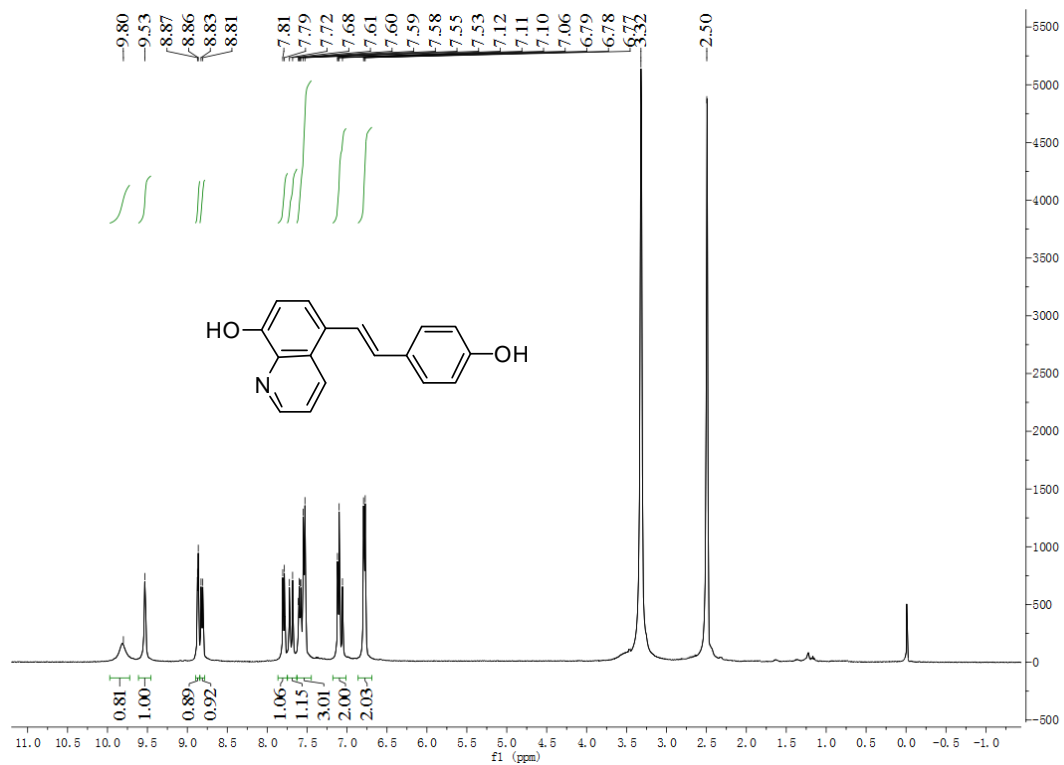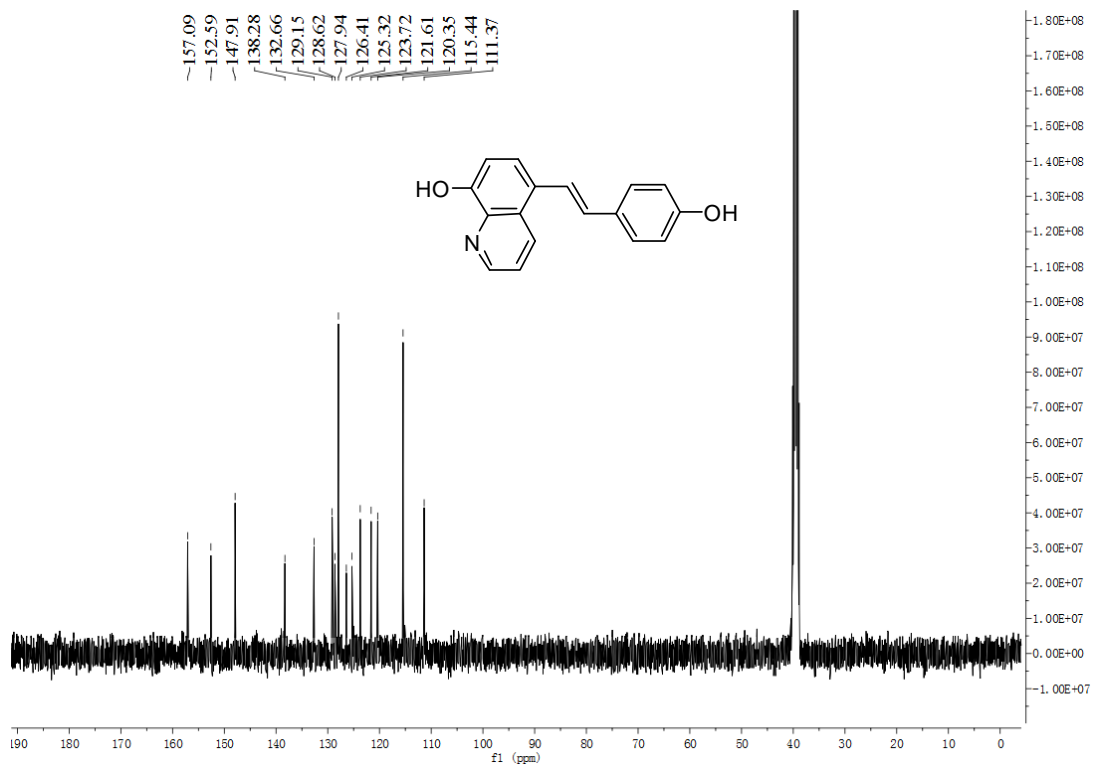

NMR spectra of compounds 10c

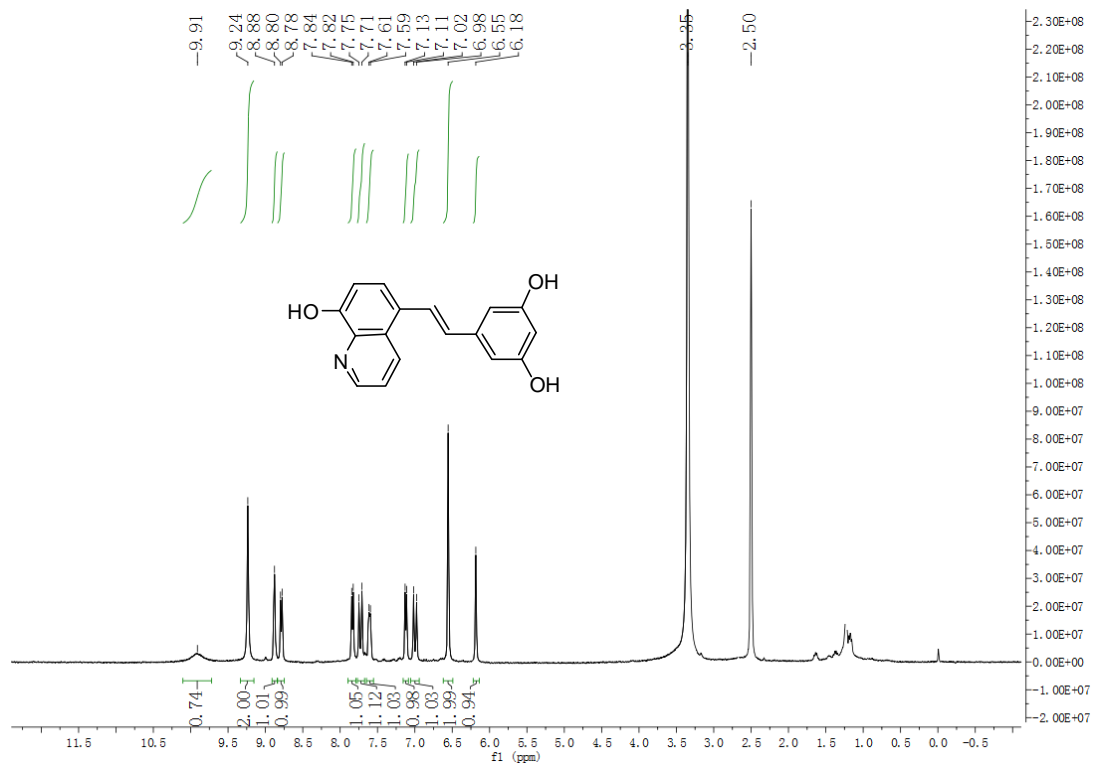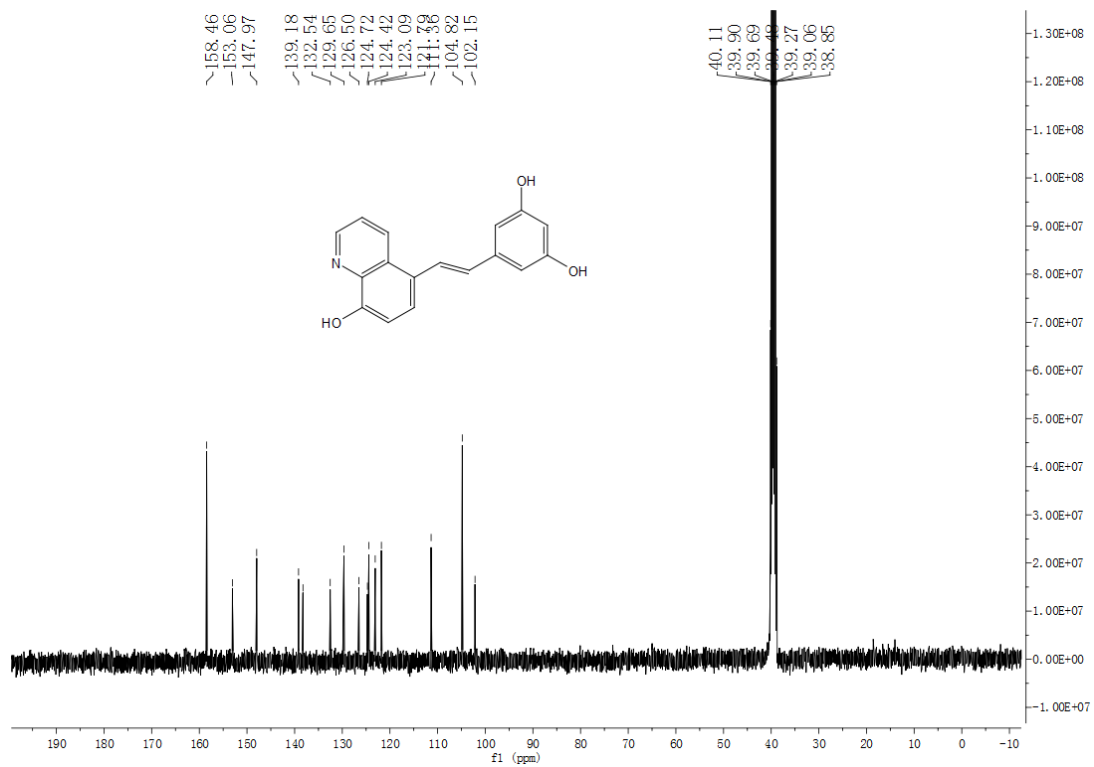

NMR spectra of compounds **10d**

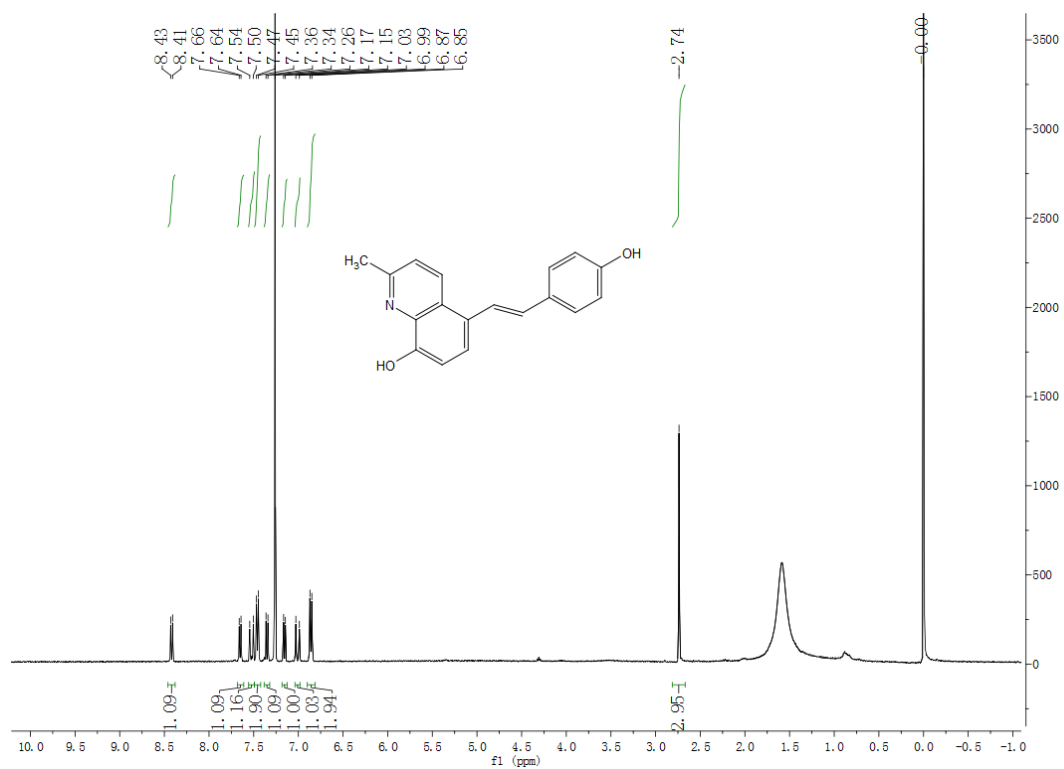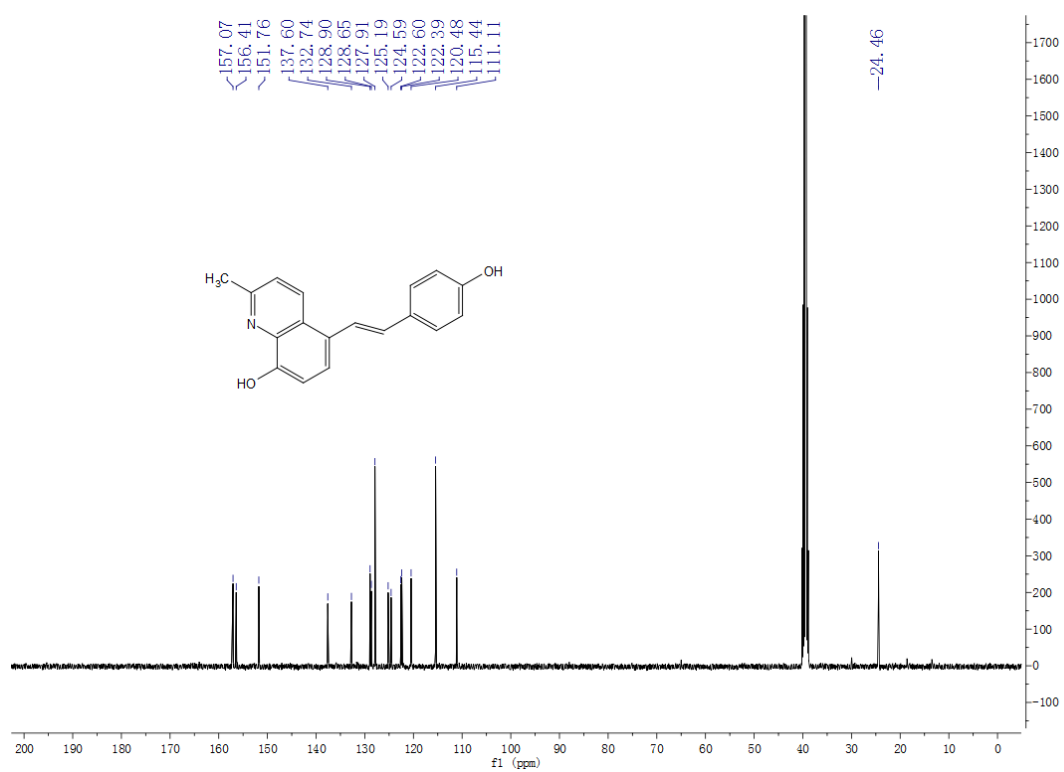

NMR spectra of compounds **10e**

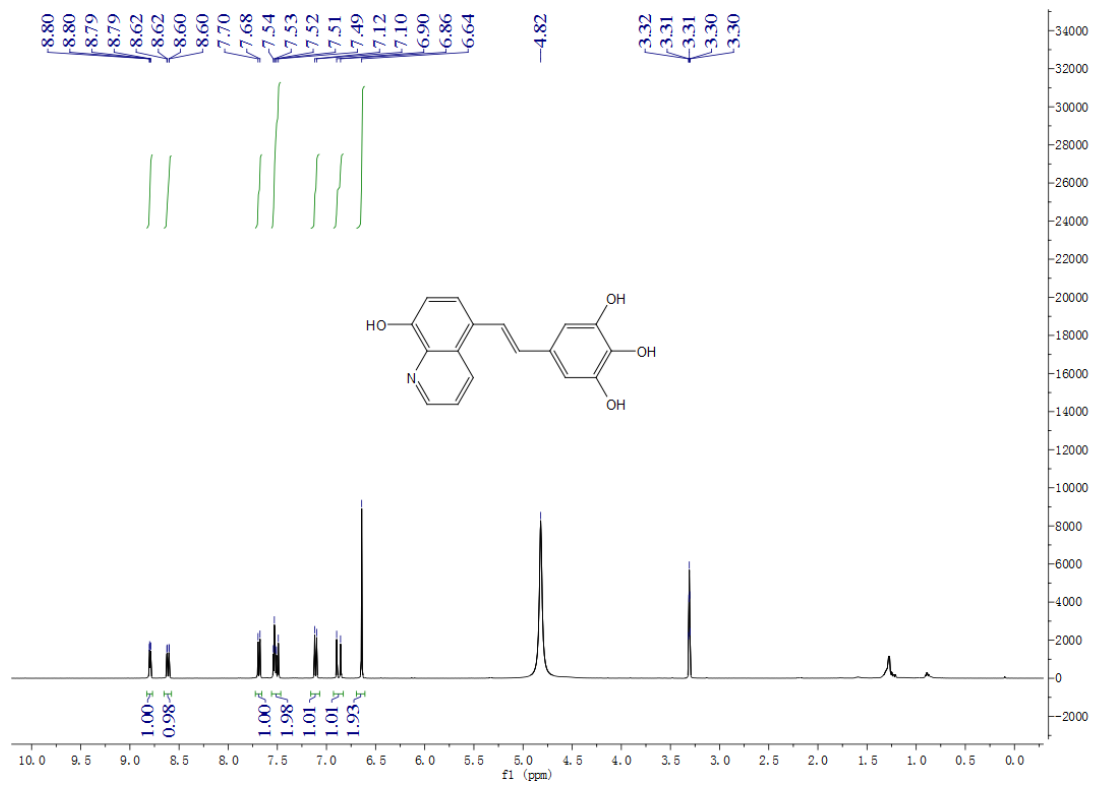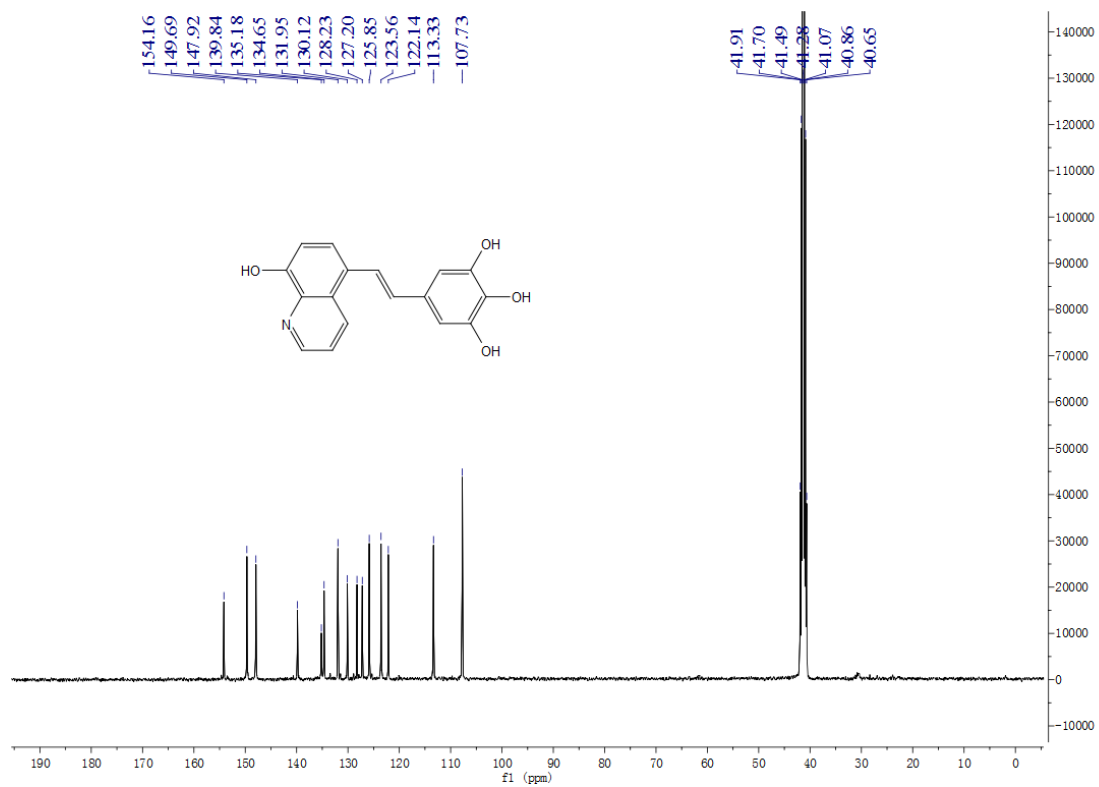

NMR spectra of compounds **10g**



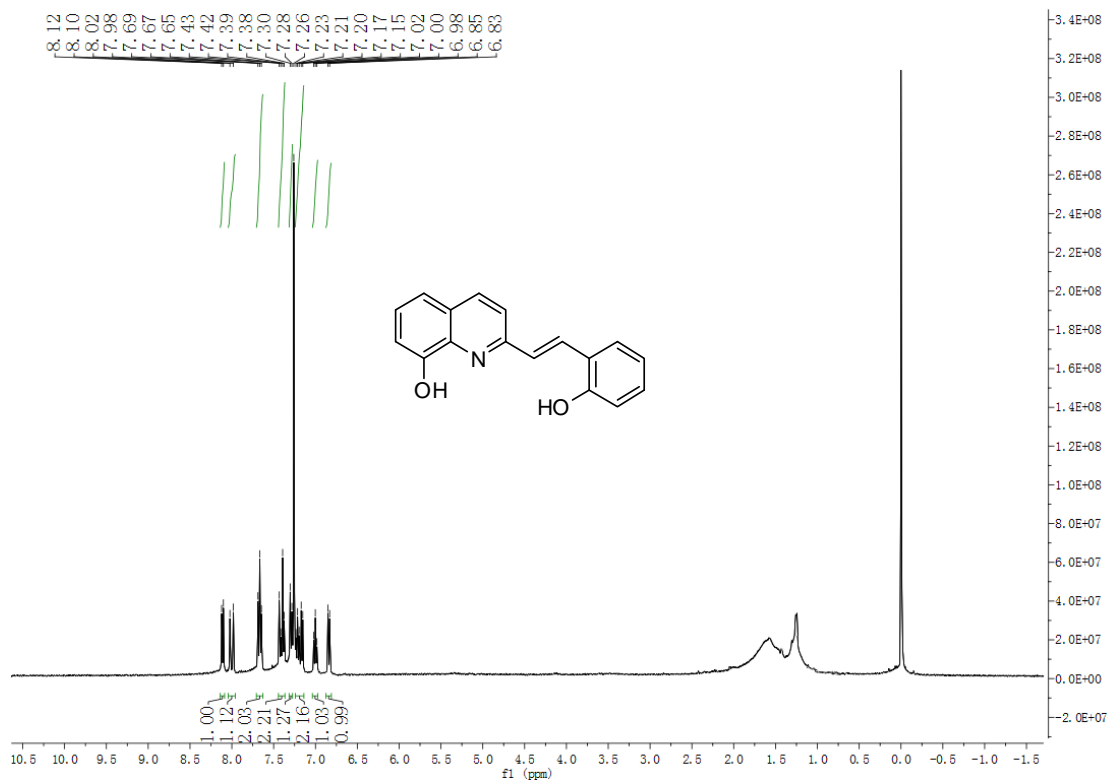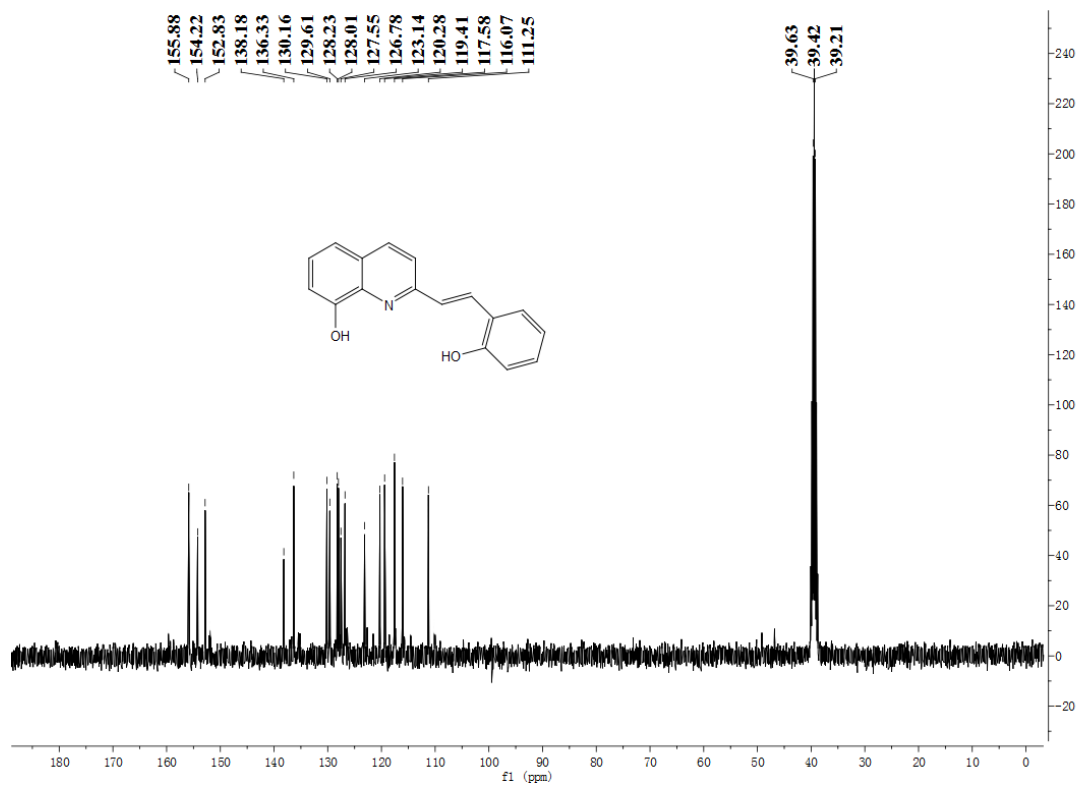

NMR spectra of compounds **13a**

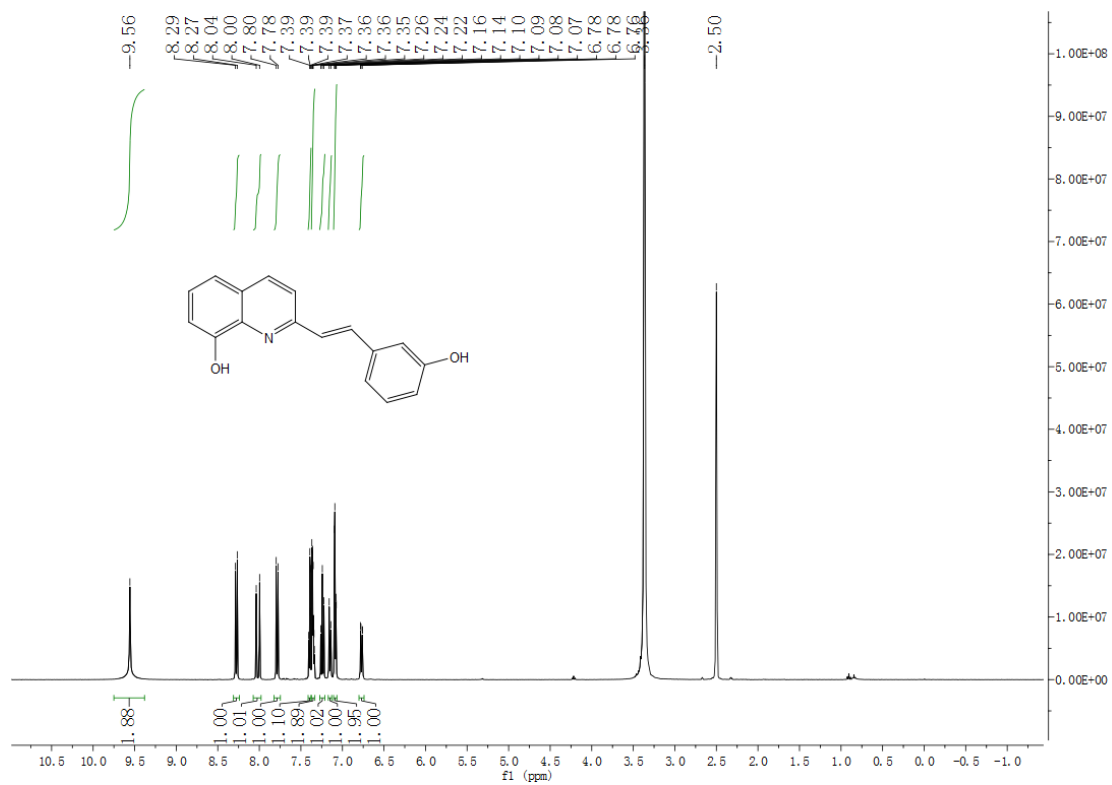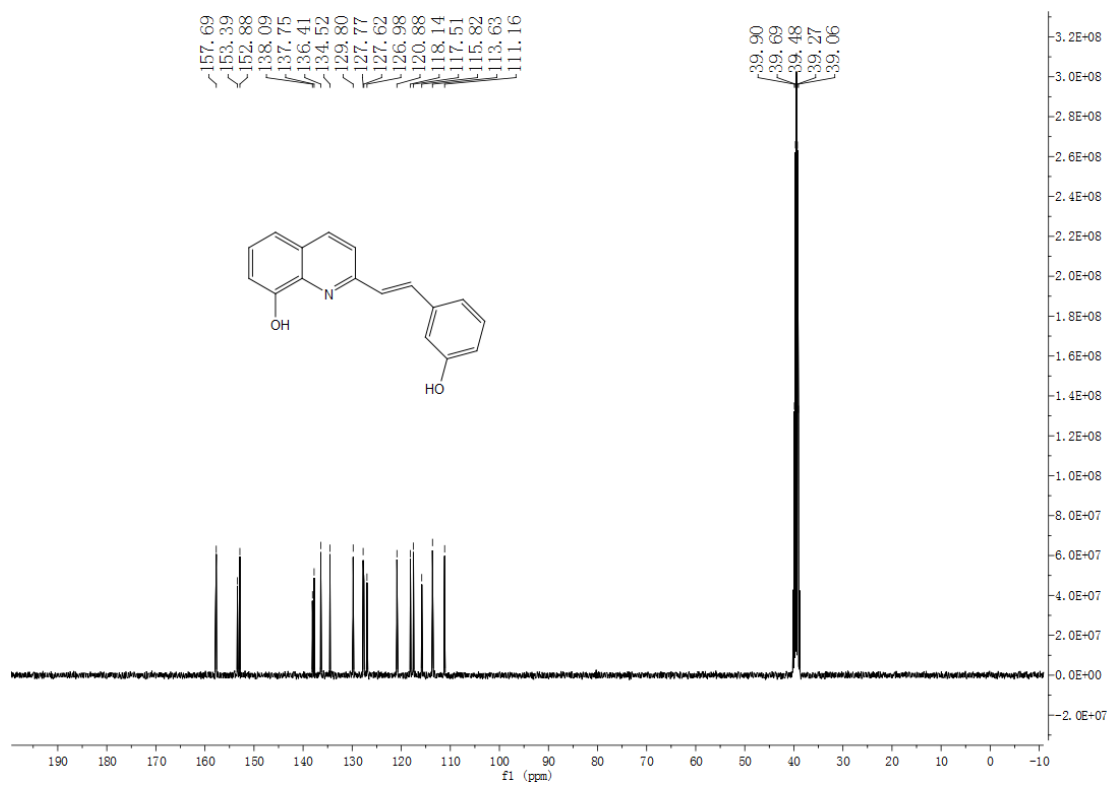

NMR spectra of compounds **13b**

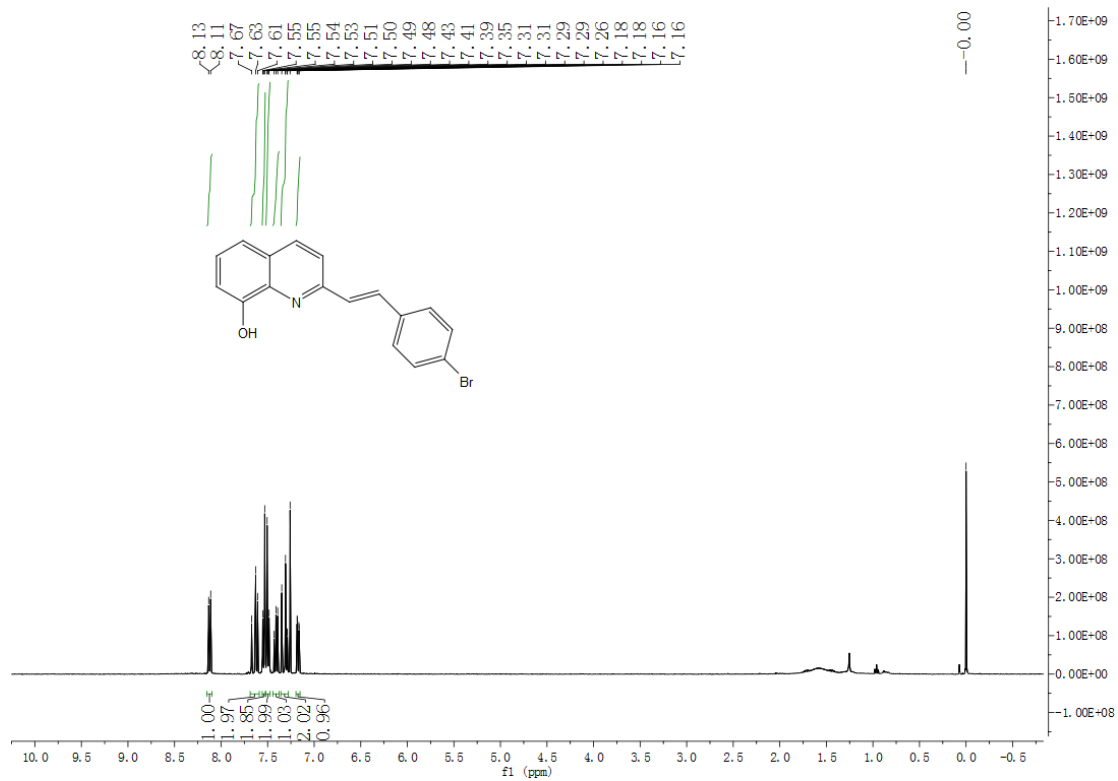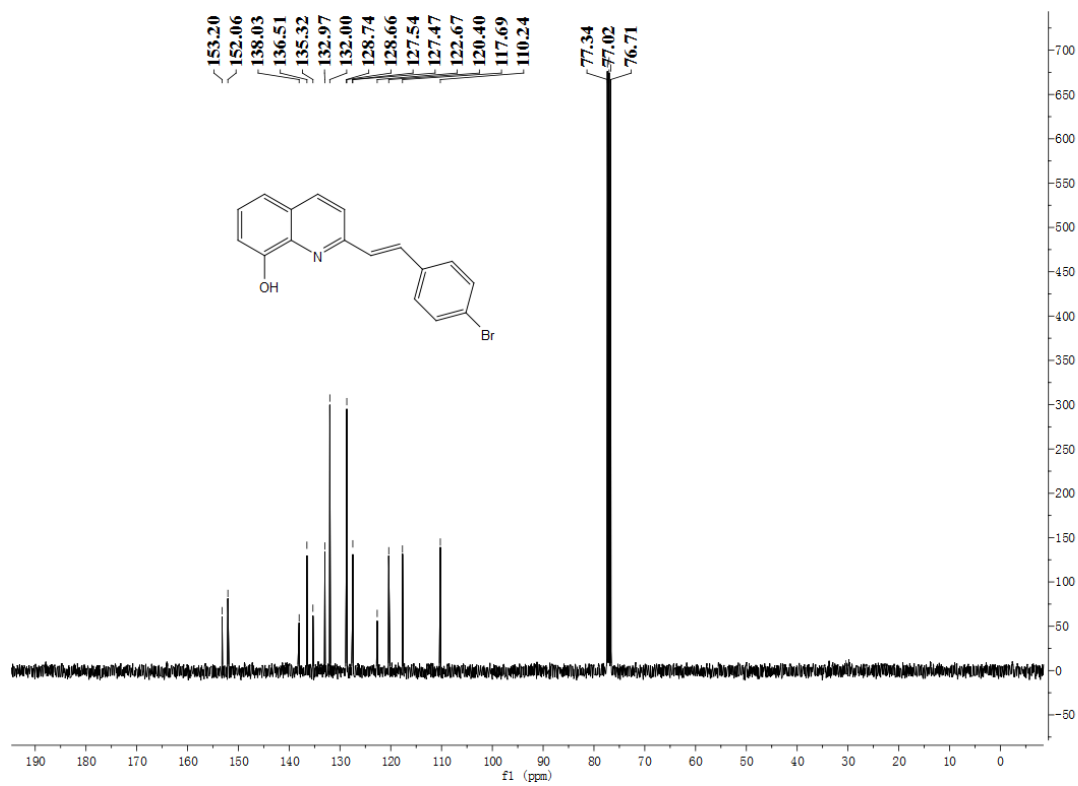

NMR spectra of compounds **13c**

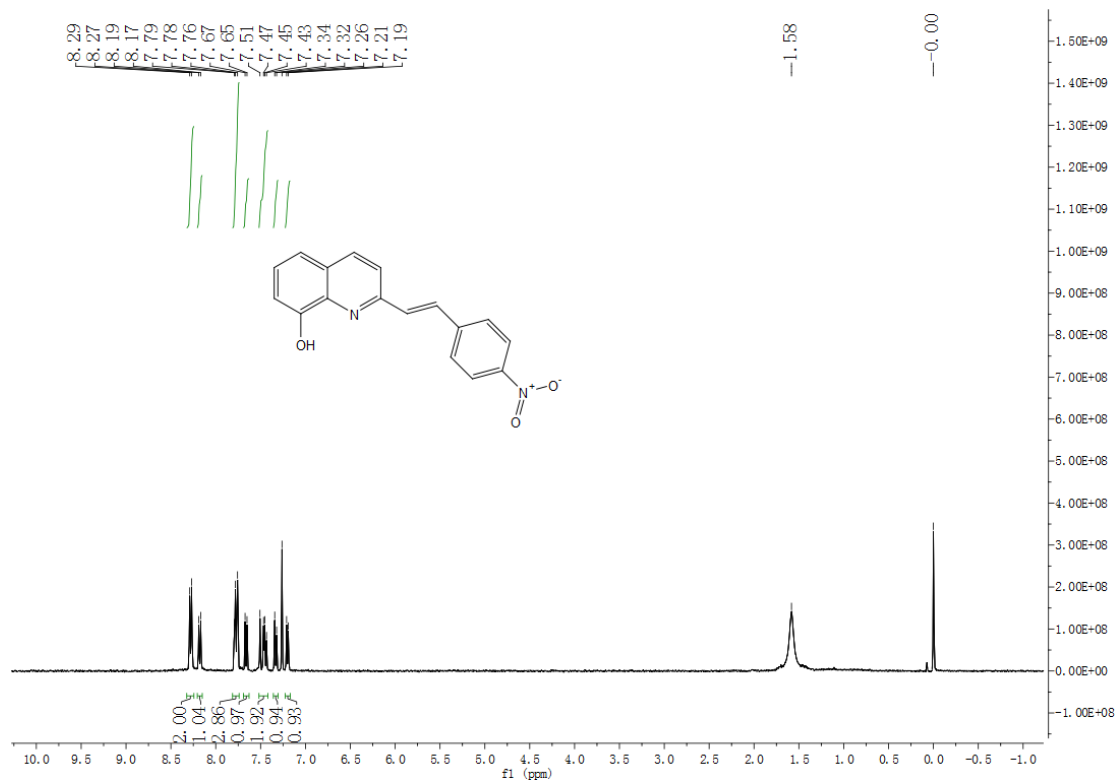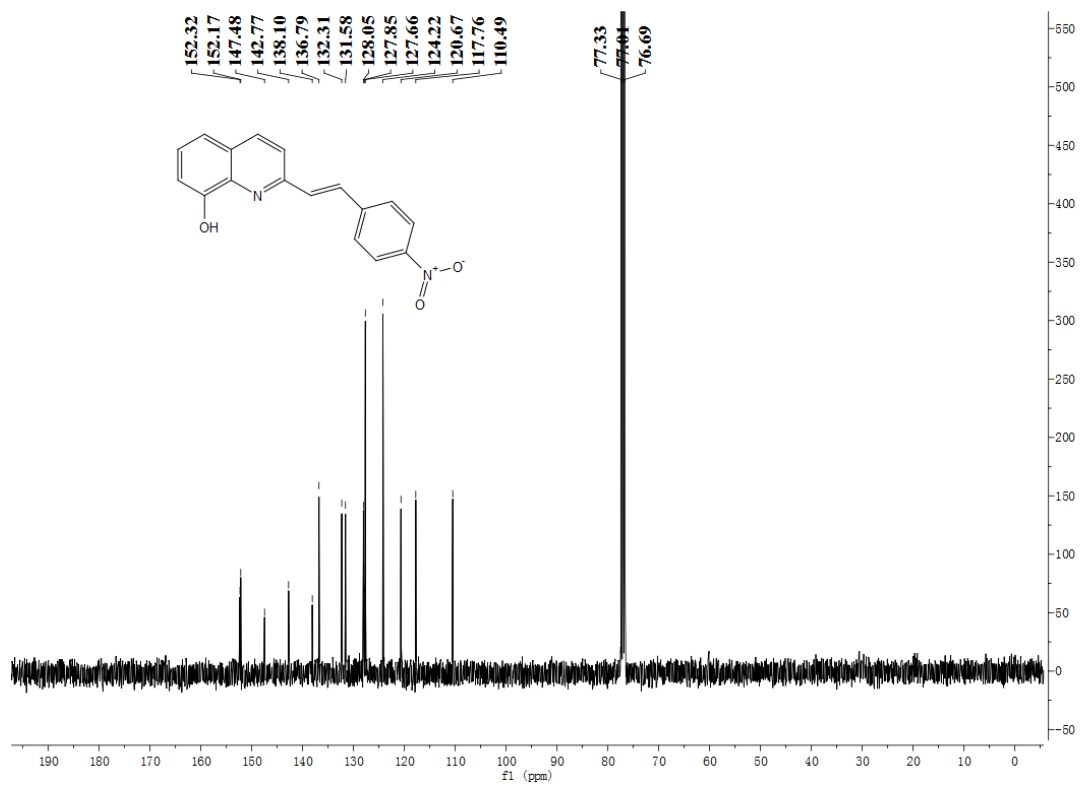

NMR spectra of compounds **13d**

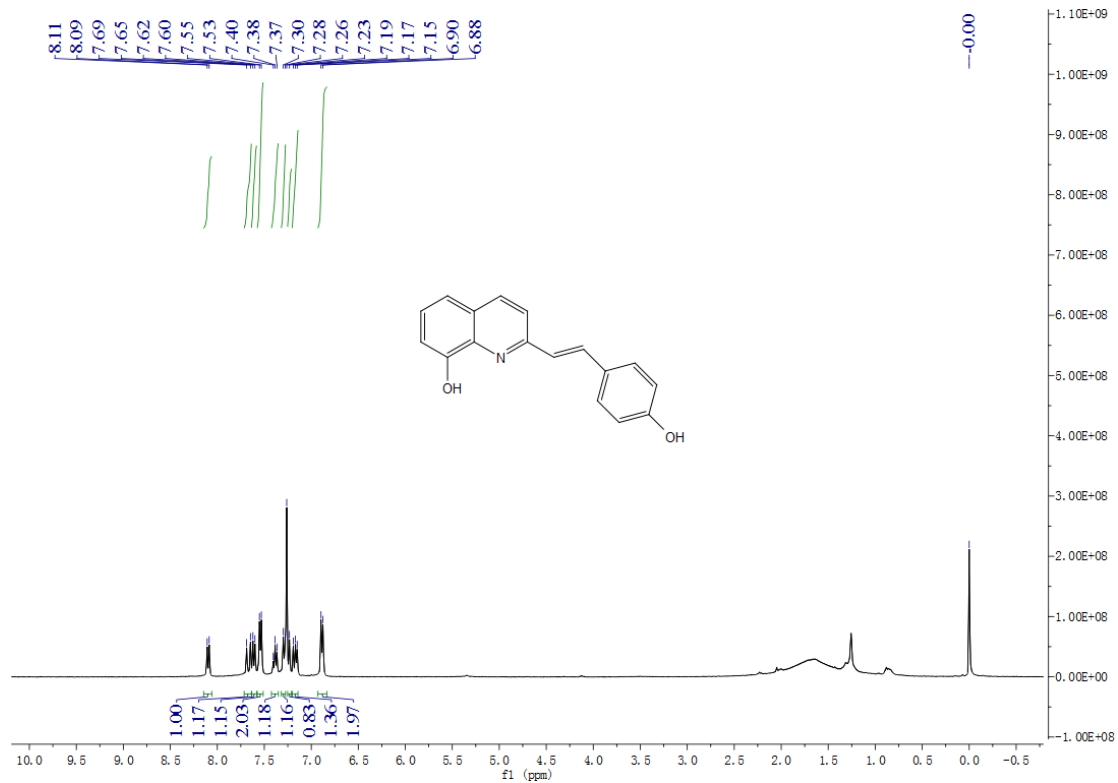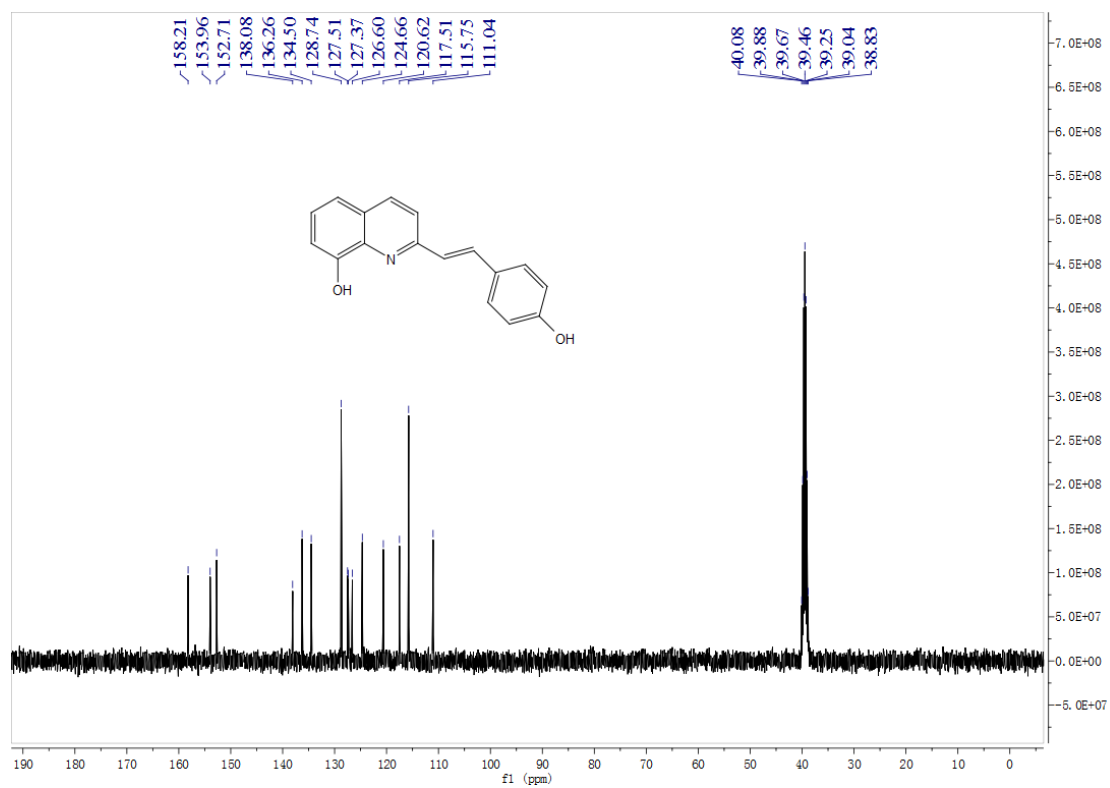

NMR spectra of compounds **13e**

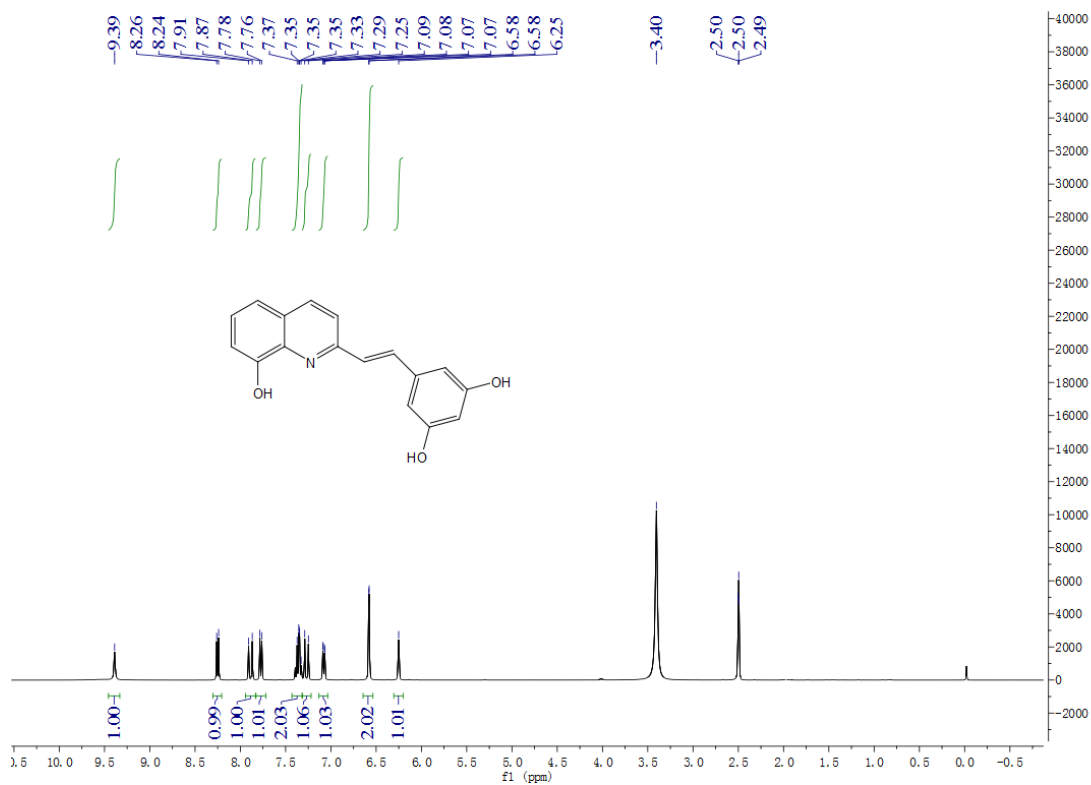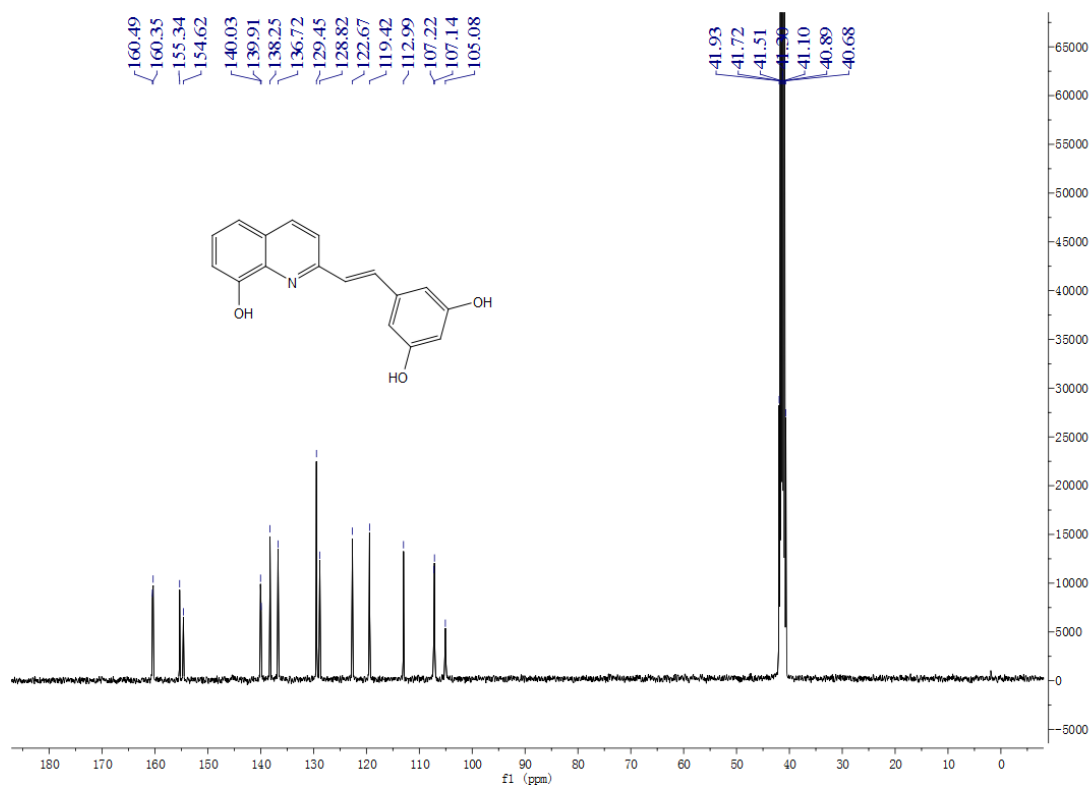

NMR spectra of compounds **13h**

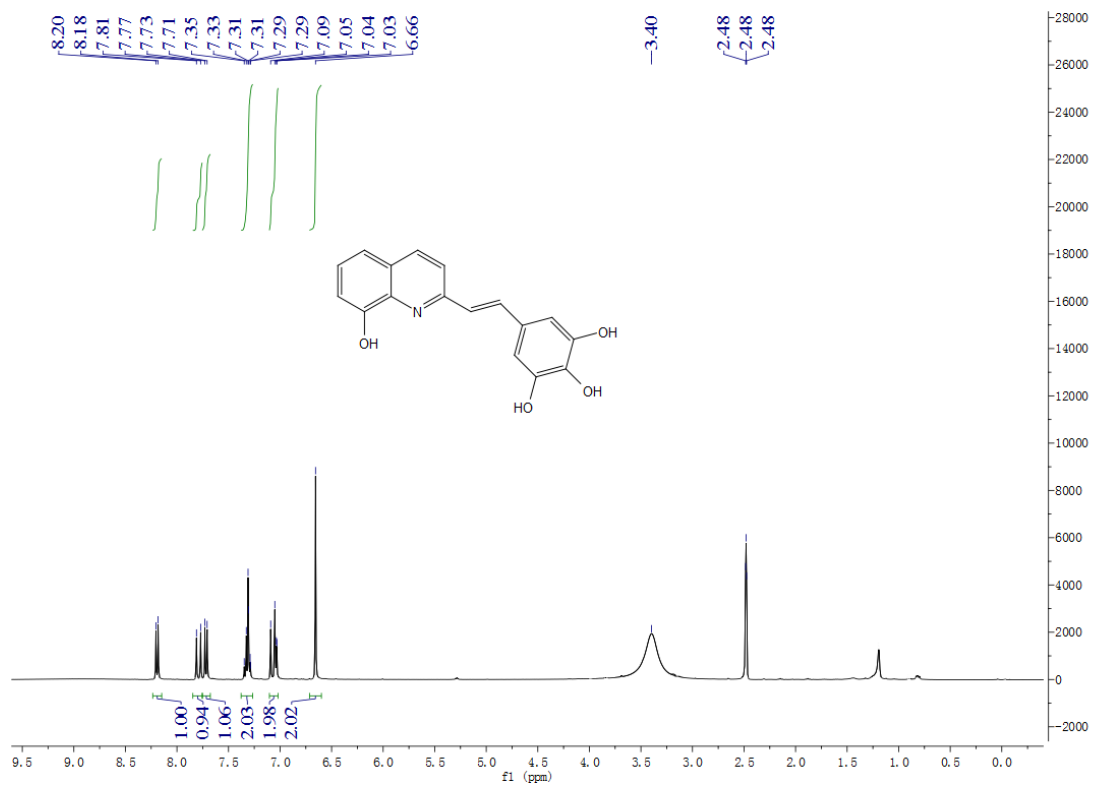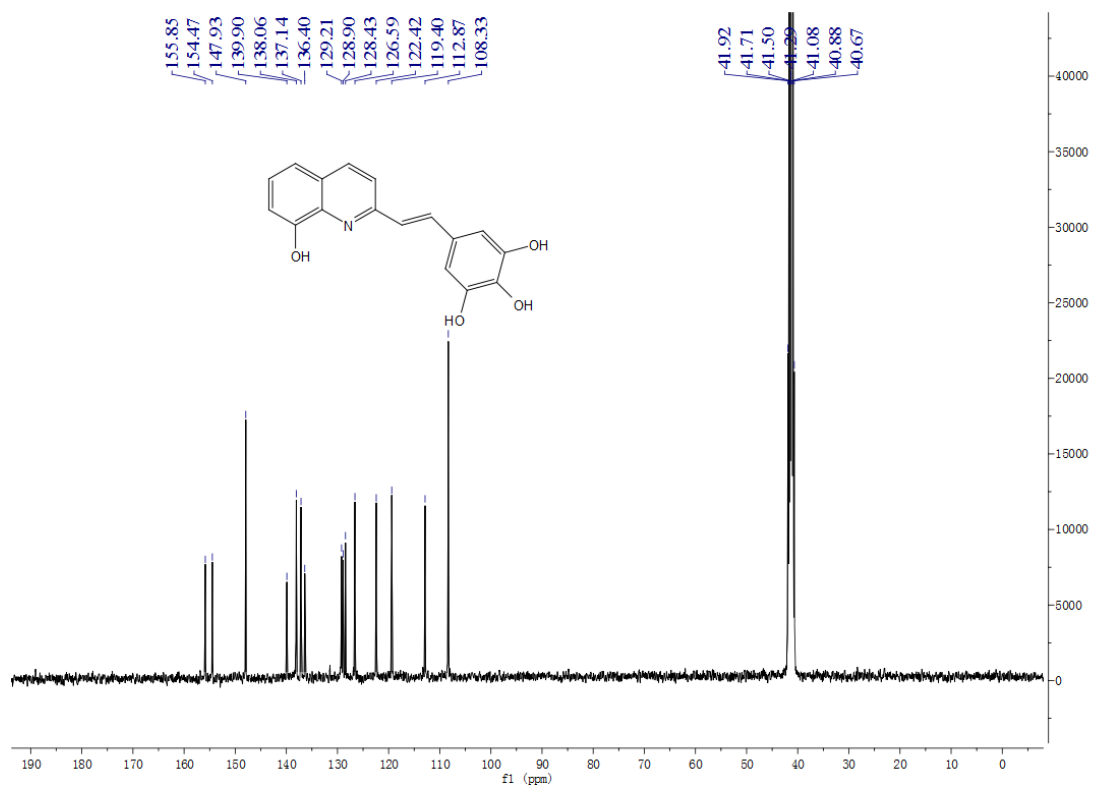

NMR spectra of compounds **13i**

## 5 HPLC chromatograms of compounds 10a-10e, 10g, 13a-e and 13h-13i.

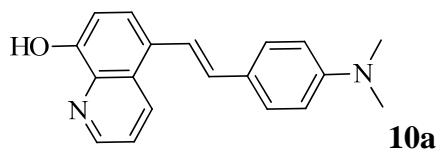

CH<sub>3</sub>CN/water (50 mM KH<sub>2</sub>PO<sub>4</sub>, pH=3.0) = 50:50,  $t_{\text{major}} = 15.473$ .

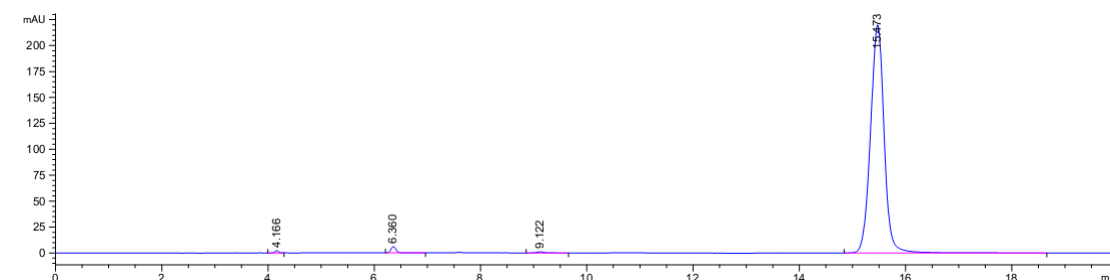

| # | [min]  |    | [min]  | [mAU*s]    | [mAU]     | %       |
|---|--------|----|--------|------------|-----------|---------|
| 1 | 4.166  | BB | 0.0777 | 11.18623   | 2.26227   | 0.2800  |
| 2 | 6.360  | VB | 0.1034 | 41.18663   | 6.05134   | 1.0309  |
| 3 | 9.122  | BB | 0.1685 | 11.86876   | 1.06074   | 0.2971  |
| 4 | 15.473 | BB | 0.2744 | 3931.14795 | 220.08394 | 98.3921 |

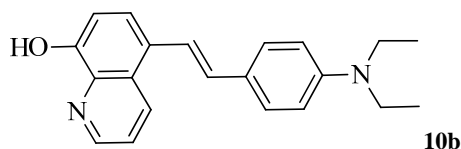

CH<sub>3</sub>CN/water (50 mM KH<sub>2</sub>PO<sub>4</sub>, pH=3.0) = 50:50,  $t_{\text{major}} = 10.734$ .

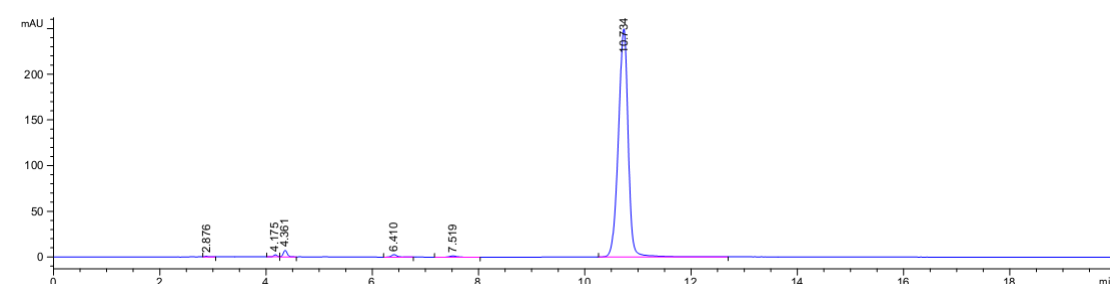

| # | [min]  |    | [min]  | [mAU*s]    | [mAU]      | %       |
|---|--------|----|--------|------------|------------|---------|
| 1 | 2.876  | VV | 0.0702 | 3.64030    | 7.83018e-1 | 0.1109  |
| 2 | 4.175  | BV | 0.0781 | 11.62552   | 2.33380    | 0.3542  |
| 3 | 4.361  | VB | 0.0822 | 38.41744   | 7.20907    | 1.1706  |
| 4 | 6.410  | BB | 0.1108 | 19.48757   | 2.68030    | 0.5938  |
| 5 | 7.519  | BB | 0.1328 | 12.50029   | 1.39204    | 0.3809  |
| 6 | 10.734 | VB | 0.1974 | 3196.09790 | 249.59860  | 97.3895 |



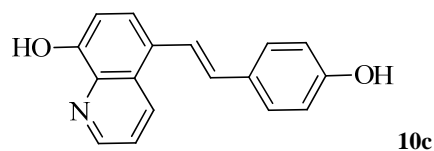

CH<sub>3</sub>CN/water (50 mM KH<sub>2</sub>PO<sub>4</sub>, pH=3.0) = 40:60,  $t_{\text{major}} = 8.344$ .

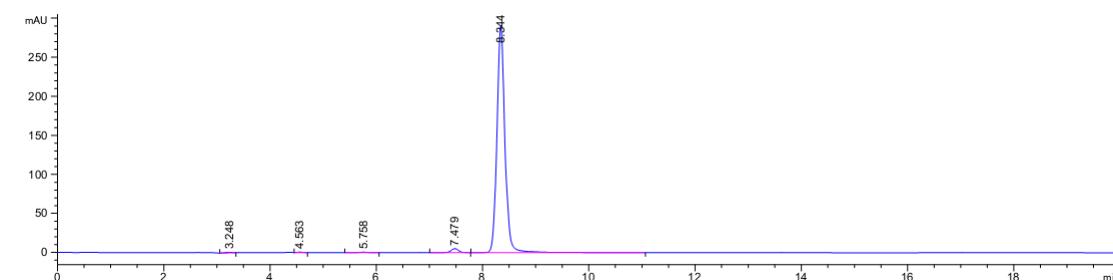

| # | [min] |    | [min]  | [mAU*s]    | [mAU]      | %       |
|---|-------|----|--------|------------|------------|---------|
| 1 | 3.248 | BV | 0.1598 | 8.40397    | 6.82049e-1 | 0.2697  |
| 2 | 4.563 | VB | 0.0953 | 4.71989    | 7.72000e-1 | 0.1515  |
| 3 | 5.758 | BB | 0.1354 | 6.01826    | 6.54046e-1 | 0.1931  |
| 4 | 7.479 | BB | 0.1511 | 49.14451   | 5.06836    | 1.5772  |
| 5 | 8.344 | BB | 0.1583 | 3047.74146 | 290.82968  | 97.8085 |

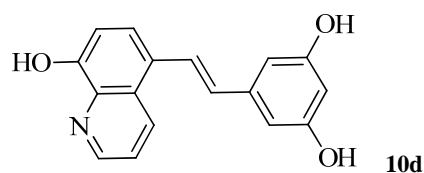

CH<sub>3</sub>CN/water (50 mM KH<sub>2</sub>PO<sub>4</sub>, pH=3.0) = 35:65,  $t_{\text{major}} = 7.806$ .

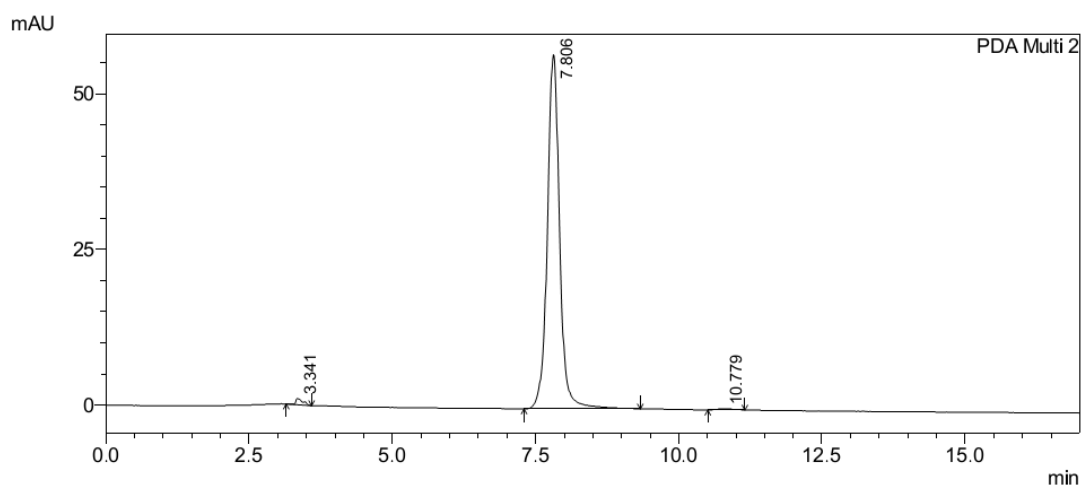

PeakTable

PDA Ch2 254nm 4nm

| Peak# | Ret. Time | Area   | Height | Area %  | Height % |
|-------|-----------|--------|--------|---------|----------|
| 1     | 3.341     | 8517   | 969    | 0.987   | 1.671    |
| 2     | 7.806     | 850803 | 56843  | 98.619  | 98.000   |
| 3     | 10.779    | 3401   | 191    | 0.394   | 0.329    |
| Total |           | 862721 | 58003  | 100.000 | 100.000  |

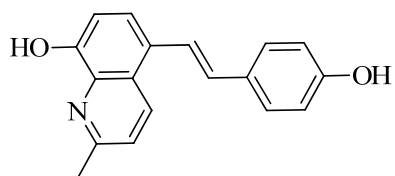

CH<sub>3</sub>CN/water (50 mM KH<sub>2</sub>PO<sub>4</sub>, pH=3.0) = 50:50, t<sub>major</sub> = 5.490.

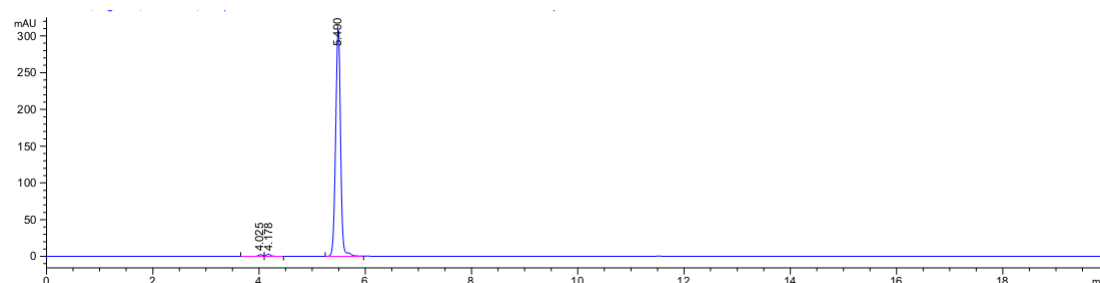

| # | [min]    | [min]  | [mAU*s]    | [mAU]     | %       |
|---|----------|--------|------------|-----------|---------|
| 1 | 4.025 BV | 0.0822 | 12.23592   | 2.29480   | 0.6087  |
| 2 | 4.178 VB | 0.0844 | 16.52155   | 2.99337   | 0.8218  |
| 3 | 5.490 BV | 0.0985 | 1981.57947 | 310.19400 | 98.5695 |

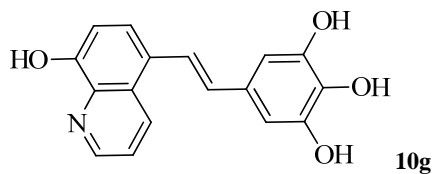

CH<sub>3</sub>CN/water (50 mM KH<sub>2</sub>PO<sub>4</sub>, pH=3.0) = 60:40, t<sub>major</sub> = 6.233.

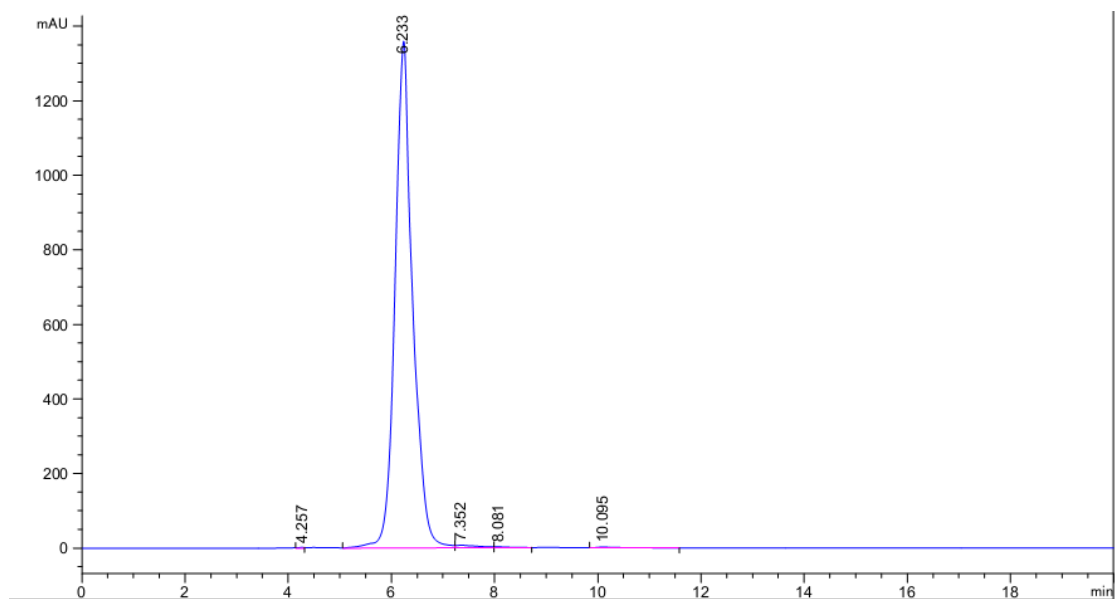

| # | [min]  |    | [min]  | [mAU*s]   | [mAU]      | %       |
|---|--------|----|--------|-----------|------------|---------|
| 1 | 4.257  | VV | 0.1180 | 17.27767  | 2.01507    | 0.0527  |
| 2 | 6.233  | VV | 0.3471 | 3.23157e4 | 1360.54871 | 98.5732 |
| 3 | 7.352  | VV | 0.4043 | 252.77437 | 7.96309    | 0.7710  |
| 4 | 8.081  | VV | 0.3807 | 98.01311  | 3.33694    | 0.2990  |
| 5 | 10.095 | VB | 0.5063 | 99.68001  | 2.51567    | 0.3041  |

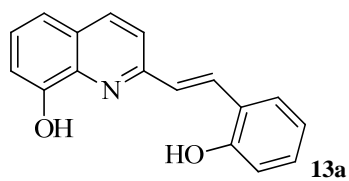

CH<sub>3</sub>CN/water (50 mM KH<sub>2</sub>PO<sub>4</sub>, pH=3.0) = 50:50,  $t_{\text{major}} = 8.614$ .

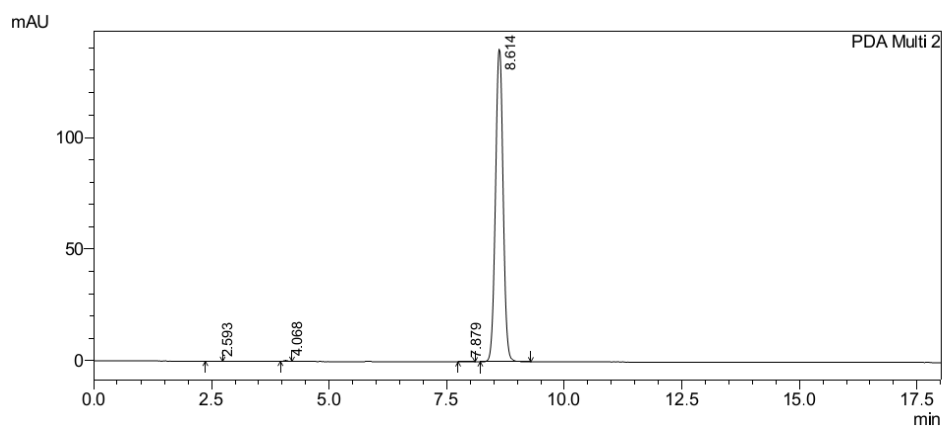

PeakTable

PDA Ch2 254nm 4nm

| Peak# | Ret. Time | Area    | Height | Area %  | Height % |
|-------|-----------|---------|--------|---------|----------|
| 1     | 2.593     | 1326    | 83     | 0.085   | 0.059    |
| 2     | 4.068     | 2379    | 408    | 0.152   | 0.291    |
| 3     | 7.879     | 1048    | 106    | 0.067   | 0.076    |
| 4     | 8.614     | 1562398 | 139948 | 99.697  | 99.575   |
| Total |           | 1567150 | 140545 | 100.000 | 100.000  |

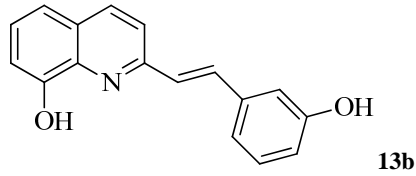

CH<sub>3</sub>CN/water (50 mM KH<sub>2</sub>PO<sub>4</sub>, pH=3.0) = 50:50, t<sub>major</sub> = 10.532.

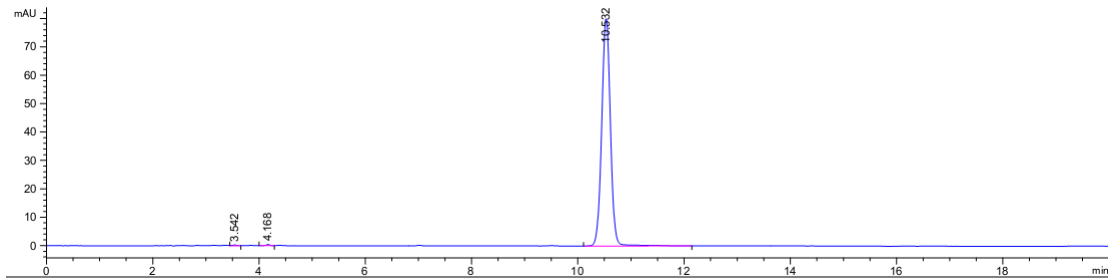

| # | [min]  |    | [min]  | [mAU*s]   | [mAU]      | %       |
|---|--------|----|--------|-----------|------------|---------|
| 1 | 3.542  | VB | 0.0744 | 1.39508   | 2.78840e-1 | 0.1519  |
| 2 | 4.168  | VV | 0.0840 | 2.30054   | 4.19163e-1 | 0.2504  |
| 3 | 10.532 | BB | 0.1774 | 914.96210 | 80.01949   | 99.5977 |

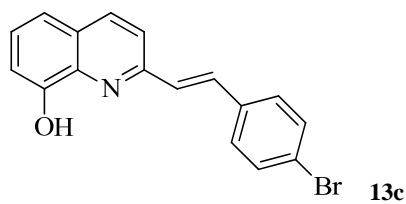

CH<sub>3</sub>CN/water (50 mM KH<sub>2</sub>PO<sub>4</sub>, pH=3.0) = 70:30, t<sub>major</sub> = 14.147.

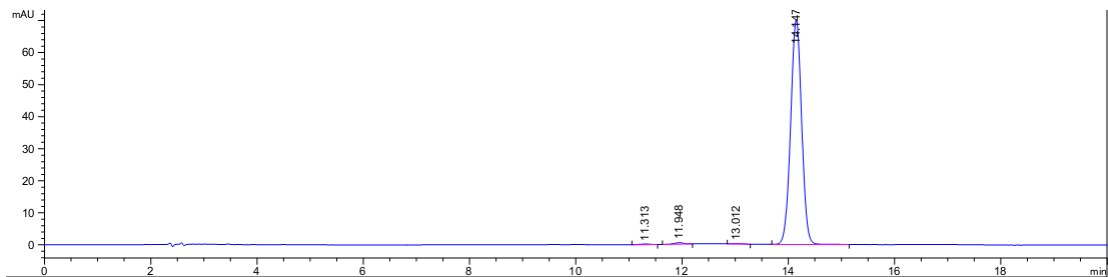

| # | [min]  |    | [min]  | [mAU*s]    | [mAU]      | %       |
|---|--------|----|--------|------------|------------|---------|
| 1 | 11.313 | BB | 0.1553 | 2.26491    | 1.98240e-1 | 0.2227  |
| 2 | 11.948 | BB | 0.1929 | 5.72655    | 4.54835e-1 | 0.5631  |
| 3 | 13.012 | BB | 0.1526 | 1.43528    | 1.22616e-1 | 0.1411  |
| 4 | 14.147 | BB | 0.2237 | 1007.49750 | 70.09422   | 99.0730 |

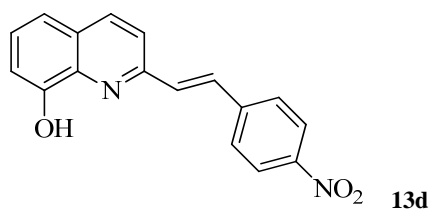

CH<sub>3</sub>CN/water (50 mM KH<sub>2</sub>PO<sub>4</sub>, pH=3.0) = 70:30,  $t_{\text{major}} = 9.164$ .

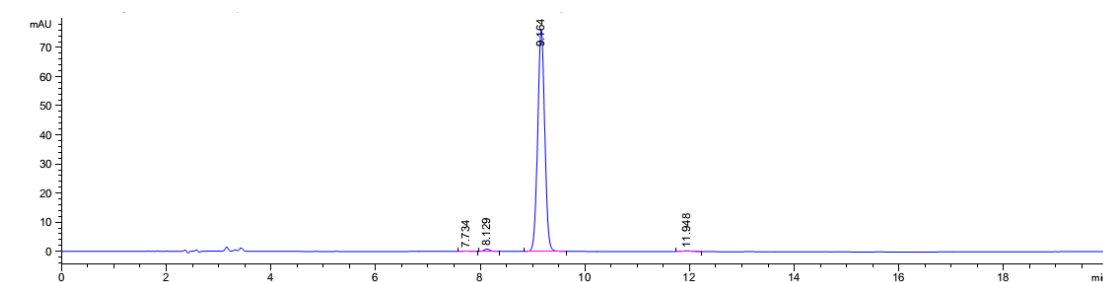

| # | [min]  |    | [min]  | [mAU*s]   | [mAU]      | %       |
|---|--------|----|--------|-----------|------------|---------|
| 1 | 7.734  | BB | 0.1263 | 1.10371   | 1.31032e-1 | 0.1518  |
| 2 | 8.129  | BB | 0.1297 | 6.72495   | 8.02943e-1 | 0.9247  |
| 3 | 9.164  | BB | 0.1456 | 716.02985 | 76.23078   | 98.4569 |
| 4 | 11.948 | BB | 0.1668 | 3.39393   | 2.85277e-1 | 0.4667  |

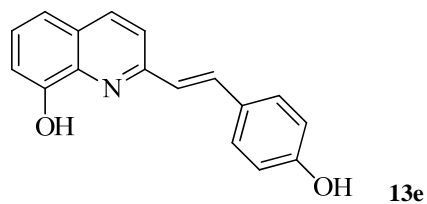

CH<sub>3</sub>CN/water (50 mM KH<sub>2</sub>PO<sub>4</sub>, pH=3.0) = 50:50,  $t_{\text{major}} = 7.228$ .

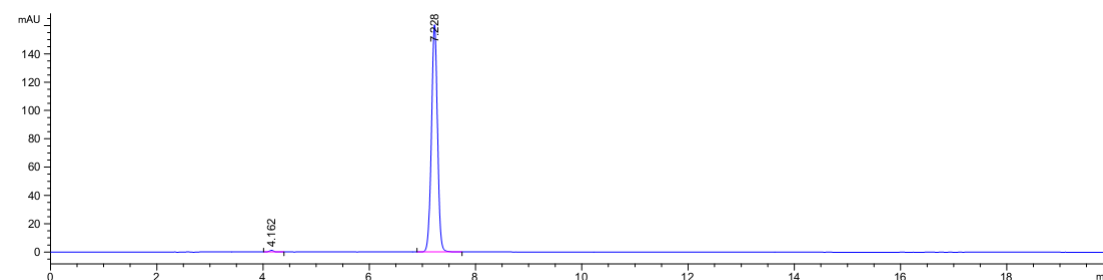

| # | [min] |    | [min]  | [mAU*s]    | [mAU]     | %       |
|---|-------|----|--------|------------|-----------|---------|
| 1 | 4.162 | BB | 0.0918 | 6.97870    | 1.16573   | 0.5454  |
| 2 | 7.228 | BV | 0.1224 | 1272.57288 | 160.63252 | 99.4546 |

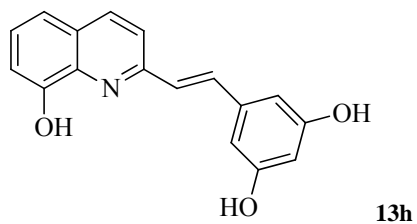

CH<sub>3</sub>CN/water (50 mM KH<sub>2</sub>PO<sub>4</sub>, pH=3.0) = 60:40,  $t_{\text{major}} = 8.324$ .

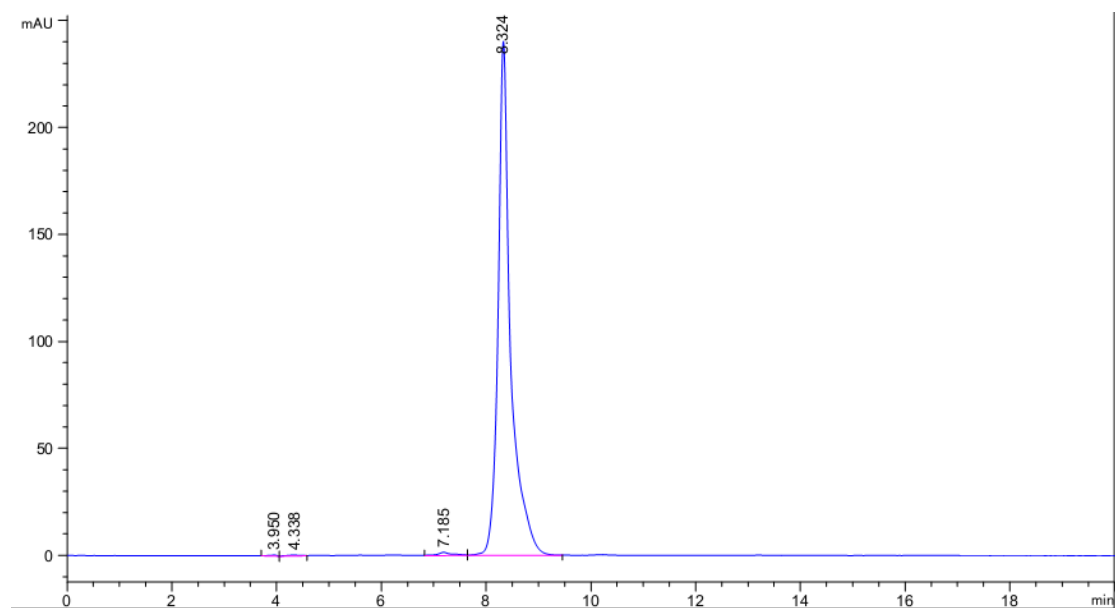

| # | [min] |    | [min]  | [mAU*s]    | [mAU]      | %       |
|---|-------|----|--------|------------|------------|---------|
| 1 | 3.950 | BV | 0.1597 | 5.97931    | 5.54792e-1 | 0.1474  |
| 2 | 4.338 | VV | 0.2900 | 11.81271   | 5.18155e-1 | 0.2913  |
| 3 | 7.185 | BV | 0.2901 | 34.71926   | 1.60665    | 0.8561  |
| 4 | 8.324 | VB | 0.2343 | 4002.86963 | 240.40729  | 98.7051 |

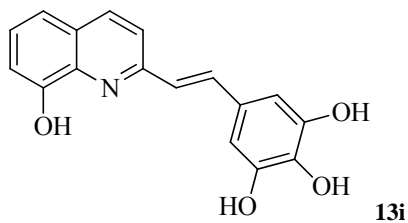

CH<sub>3</sub>CN/water (50 mM KH<sub>2</sub>PO<sub>4</sub>, pH=3.0) = 60:40,  $t_{\text{major}} = 7.039$ .

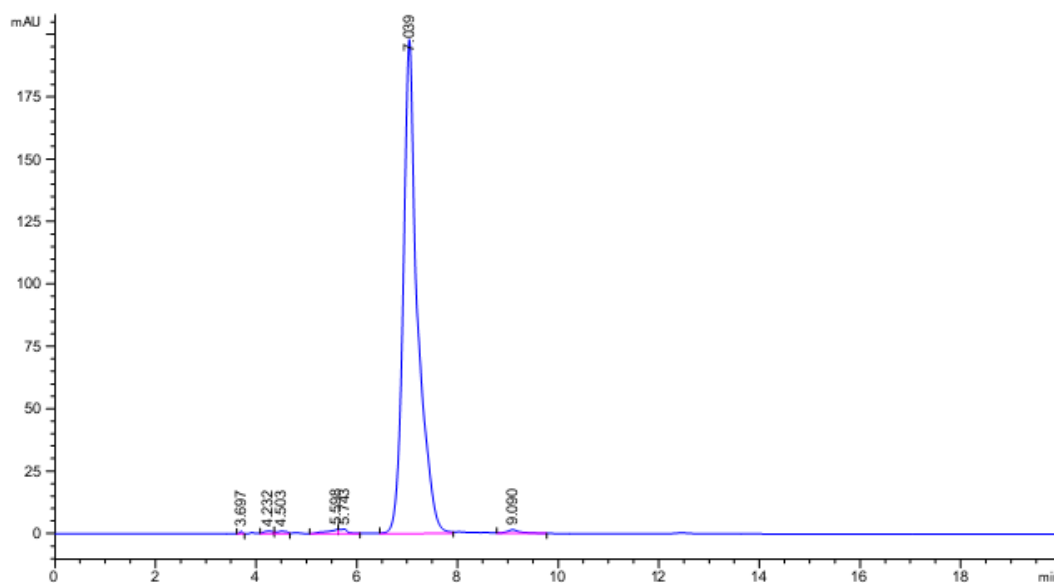

| # | [min] |    | [min]  | [mAU*s]    | [mAU]     | %       |
|---|-------|----|--------|------------|-----------|---------|
| 1 | 3.697 | BV | 0.0525 | 3.54074    | 1.07191   | 0.0878  |
| 2 | 4.232 | VV | 0.1650 | 13.98283   | 1.09502   | 0.3466  |
| 3 | 4.503 | VV | 0.1894 | 15.33303   | 1.10839   | 0.3801  |
| 4 | 5.598 | VV | 0.2110 | 28.78130   | 1.70432   | 0.7135  |
| 5 | 5.743 | VB | 0.1700 | 23.68266   | 1.89265   | 0.5871  |
| 6 | 7.039 | BV | 0.2805 | 3915.63940 | 198.14890 | 97.0654 |

## 6 References

1. T. Katoh, O. Ohmori, K. Iwasaki and M. Inoue, *Tetrahedron*, 2002, **58**, 1289-1299.
2. C. A. Townsend, S. B. Christensen and S. G. Davis, *J. Chem. Soc. Perk. T.1*, 1988, 839-861.
3. H. Zheng, L. M. Weiner, O. Bar-Am, S. Epsztejn, Z. I. Cabantchik, A. Warshawsky, M. B. Youdim and M. Fridkin, *Bioorgan. med. chem.*, 2005, **13**, 773-783.
4. S. Madonna, A. Marcowycz, D. Lamoral-Theys, G. Van Goietsenoven, J. Dessolin, C. Pirker, S. Spiegl-Kreinecker, C.-A. Biraboneye, W. Berger, R. Kiss and J.-L. Kraus, *J. Heterocyclic Chem.*, 2010, **47**, 719-723.
5. F. S. Chang, W. Chen, C. Wang, C. C. Tzeng and Y. L. Chen, *Bioorgan. med. chem.*, 2010, **18**, 124-133.
6. L. Chen, P. Tao, C. Sun, X. Liu and B. Xu, *Synthetic Met.*, 2011, **161**, 1145-1149.
7. M. Rosini, E. Simoni, M. Bartolini, A. Cavalli, L. Ceccarini, N. Pascu, D. W. McClymont, A. Tarozzi, M. L. Bolognesi, A. Minarini, V. Tumiatti, V. Andrisano, I. R. Mellor and C. Melchiorre, *J. Med. Chem.*, 2008, **51**, 4381-4384.
8. J.-S. Choi, J. J. Braymer, R. P. R. Nanga, A. Ramamoorthy and M. H. Lim, *Proc. Natl. Acad. Sci. USA.*, 2010, **107**, 21990-21995.
9. A. K. Sharma, S. T. Pavlova, J. Kim, D. Finkelstein, N. J. Hawco, N. P. Rath, J. Kim and L. M. Mirica, *J. Am. Chem. Soc.*, 2012, **134**, 6625-6636.
10. X. Wang, X. Wang, C. Zhang, Y. Jiao and Z. Guo, *Chem. Sci.*, 2012, **3**, 1304-1312.
11. B. Ou, M. Hampsch-Woodill and R. L. Prior, *J. Agr. Food Chem.*, 2001, **49**, 4619-4626.
12. A. Dávalos, C. Gómez-Cordovés and B. Bartolomé, *J. Agr. Food Chem.*, 2003, **52**, 48-54.
13. M. Decker, B. Kraus and J. Heilmann, *Bioorgan. med. chem.*, 2008, **16**, 4252-4261.

14. L. Guilloreau, S. Combalbert, A. Sournia-Saquet, H. Mazarguil and P. Faller, *ChemBioChem*, 2007, **8**, 1317-1325.
15. L. Di, E. H. Kerns, K. Fan, O. J. McConnell and G. T. Carter, *Eur. J. Med. Chem.*, 2003, **38**, 223-232.
16. F. Wohlsland and B. Faller, *J. Med. Chem.*, 2001, **44**, 923-930.
17. K. Sugano, H. Hamada, M. Machida and H. Ushio, *J. Biomol. Screen.*, 2001, **6**, 189-196.
18. R. Cao, Q. Chen, X. Hou, H. Chen, H. Guan, Y. Ma, W. Peng and A. Xu, *Bioorgan. Med. Chem.*, 2004, **12**, 4613-4623.
